# Supplementary material for: 3′LIFE: a functional assay to detect miRNA targets in high-throughput
Source: PubMed Central journal article supplement — Nucleic Acids Res. 2014 Jul 29;42(17):e132. doi: 10.1093/nar/gku626 (PMC4176154; doi:10.1093/nar/gku626), 2014-07-29
Supplement: supp_gku626_nar-01170-met-g-2014-File003.pdf [file supp_gku626_nar-01170-met-g-2014-File003.pdf]

Supporting Online Material for:

**3'LIFE: A Functional Assay to Detect miRNA Targets  
in High-Throughput**

Justin M. Wolter, Kasuen Kotagama, Alexandra C. Pierre-Bez, Mari Firago and Marco Mangone\*

\* To whom correspondence should be addressed. Tel: (480) 965-7957; Email:  
mangone@asu.edu

**This PDF includes:**

**Supplementary Figures 1-8**

**Supplementary Table 1 – Primers used for cloning**

**Supplementary Table 2a - 3'LIFE hits - *let-7c***

**Supplementary Table 2b - 3'LIFE hits - *miR-10b***

**Supplementary Table 3 - Literature review**

**Supplementary Materials and Methods**

## Table of Contents

### Supporting Online Material

|                                                                                                                 |    |
|-----------------------------------------------------------------------------------------------------------------|----|
| <b>Supplementary Figure 1:</b> Predicted miRNA targets have high false negative rates                           | 3  |
| <b>Supplementary Figure 2:</b> 3'LIFE assay plasmid maps                                                        | 4  |
| <b>Supplementary Figure 3:</b> Expression and splicing of pri-miRNA from pLIFE-miRNA vector                     | 5  |
| <b>Supplementary Figure 4:</b> PGK promoter is 80% weaker than CMV promoter                                     | 6  |
| <b>Supplementary Figure 5:</b> Development of nucleofection transfection buffers                                | 7  |
| <b>Supplementary Figure 6:</b> 3'LIFE cloning pipeline                                                          | 8  |
| <b>Supplementary Figure 7:</b> miRNA delivered using both weak and strong promoters identify comparable targets | 9  |
| <b>Supplementary Figure 8:</b> Comparative analysis of 3'LIFE with AGO-HITS-CLIP                                | 10 |
| <b>Supplementary Table 1:</b> Primers used for cloning                                                          | 11 |
| <b>Supplementary Table 2a:</b> 3'LIFE hits - <i>let-7c</i>                                                      | 1J |
| <b>Supplementary Table 2b:</b> 3'LIFE hits - <i>miR-10b</i>                                                     | 24 |
| <b>Supplementary Table 3:</b> Literature review                                                                 | 27 |
| <b>Supplementary Materials and Methods</b>                                                                      | 3Î |

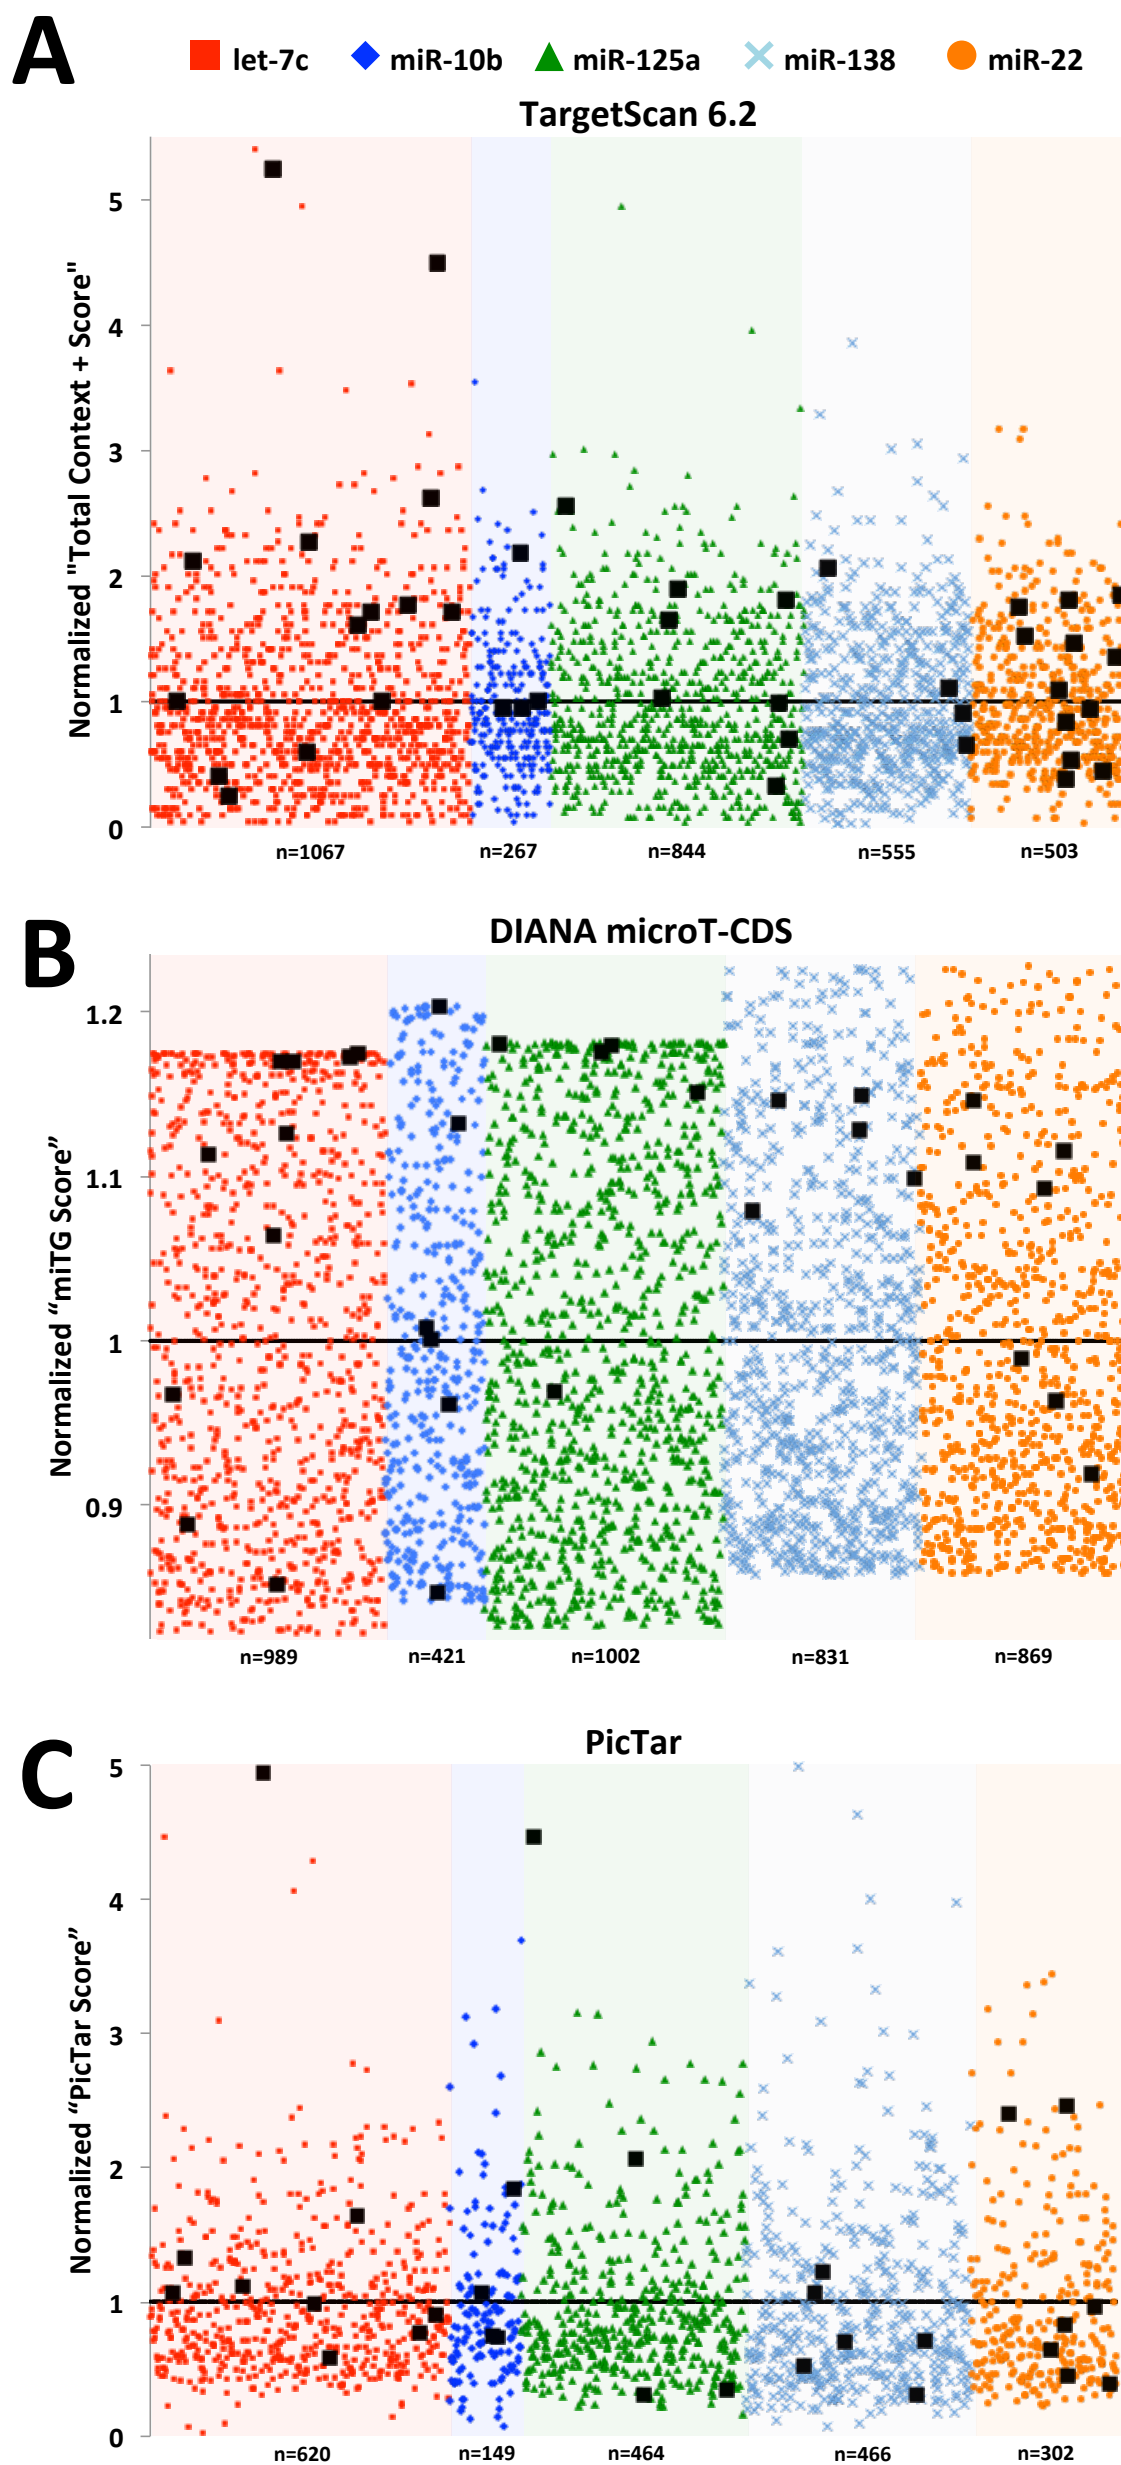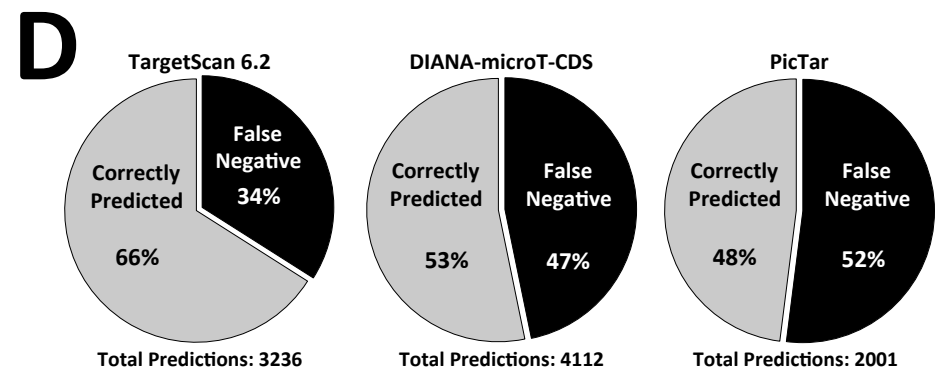

**Supplementary Figure 1.** Predicted miRNA targets have high false negative rates. We have superimposed all the experimentally validated miRNA targets of five cancer-related miRNAs (x-axis, black dots) to target predictions produced by a panel of widely utilized prediction algorithms, TargetScan (**A**) (5), DIANA microT-CDS (**B**) (42), and PicTar (**C**) (8). The Y-axis represents the normalized targeting score assigned to each prediction, with the black horizontal line representing the normalized mean. We show the same five representative miRNAs in each panel. These miRNAs were selected for this analysis based on 1) their significant presence in the literature, 2) their correlation with oncogenic pathways, and 3) their uncharacteristic high number of validated gene targets when compared to other less studied miRNAs. (**D**) Among 67 experimentally validated targets for these five miRNAs, 34% were not predicted by TargetScan, 47% were not predicted by DIANA-microT-CDS, and 52% were not predicted by PicTar. Of note, these algorithms produce thousands of predictions that are yet to be tested, representing >98% of predicted targets. This comprehensive list was compiled utilizing miRTarbase (40) and by our own manual literature review of up-to-date resources.

**A**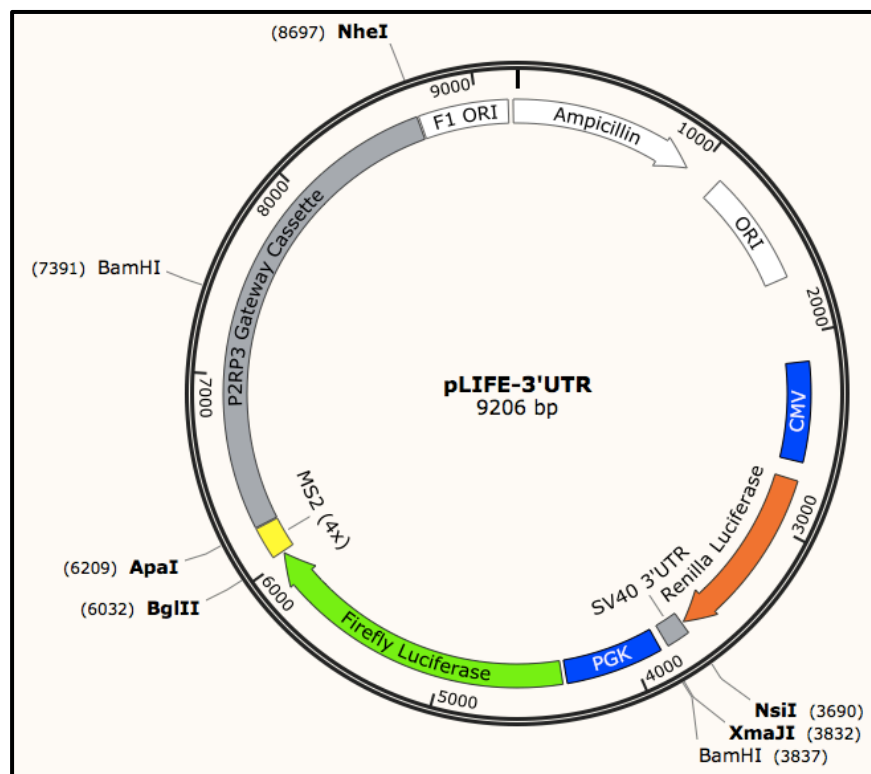**B**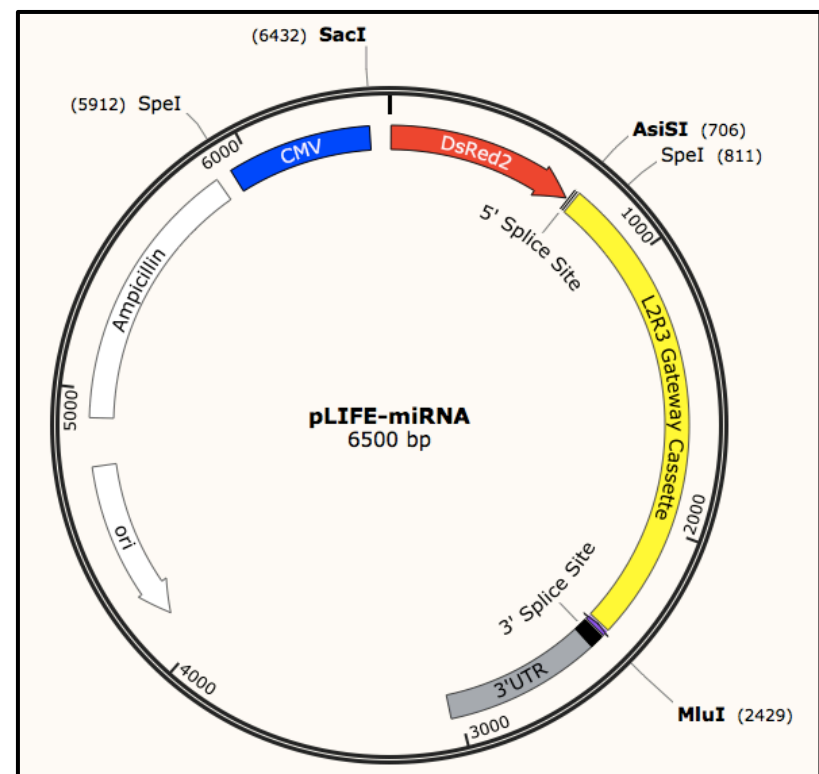

**Supplementary Figure 2.** 3'LIFE assay plasmid maps **(A)** pLIFE-3'UTR **(B)** pLIFE-miRNA. Positions of restriction sites used to clone various elements are noted. Plasmids are available through DNASU Plasmid Repository ([www.DNASU.org](http://www.DNASU.org), clone IDs:EvNO00601503 and EvNO00601504).

<http://dnasu.org/DNASU/GetCloneDetail.do?cloneid=601503>

<http://dnasu.org/DNASU/GetCloneDetail.do?cloneid=601504>



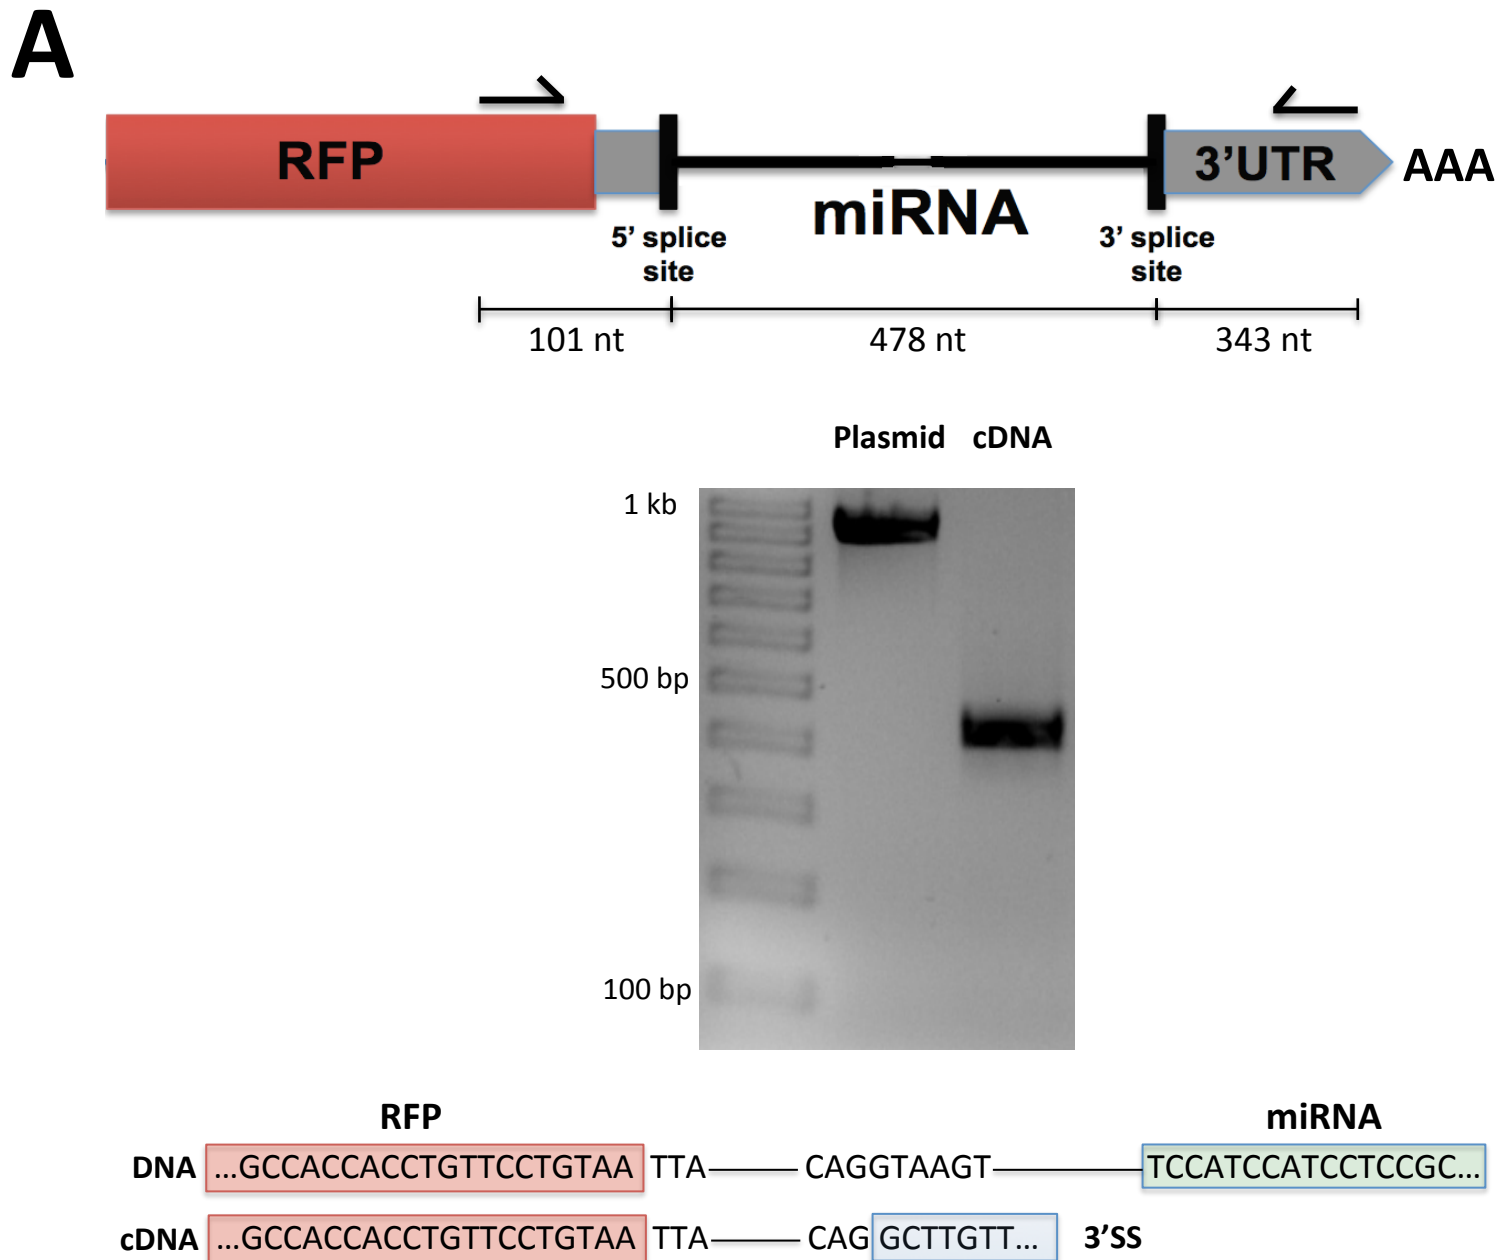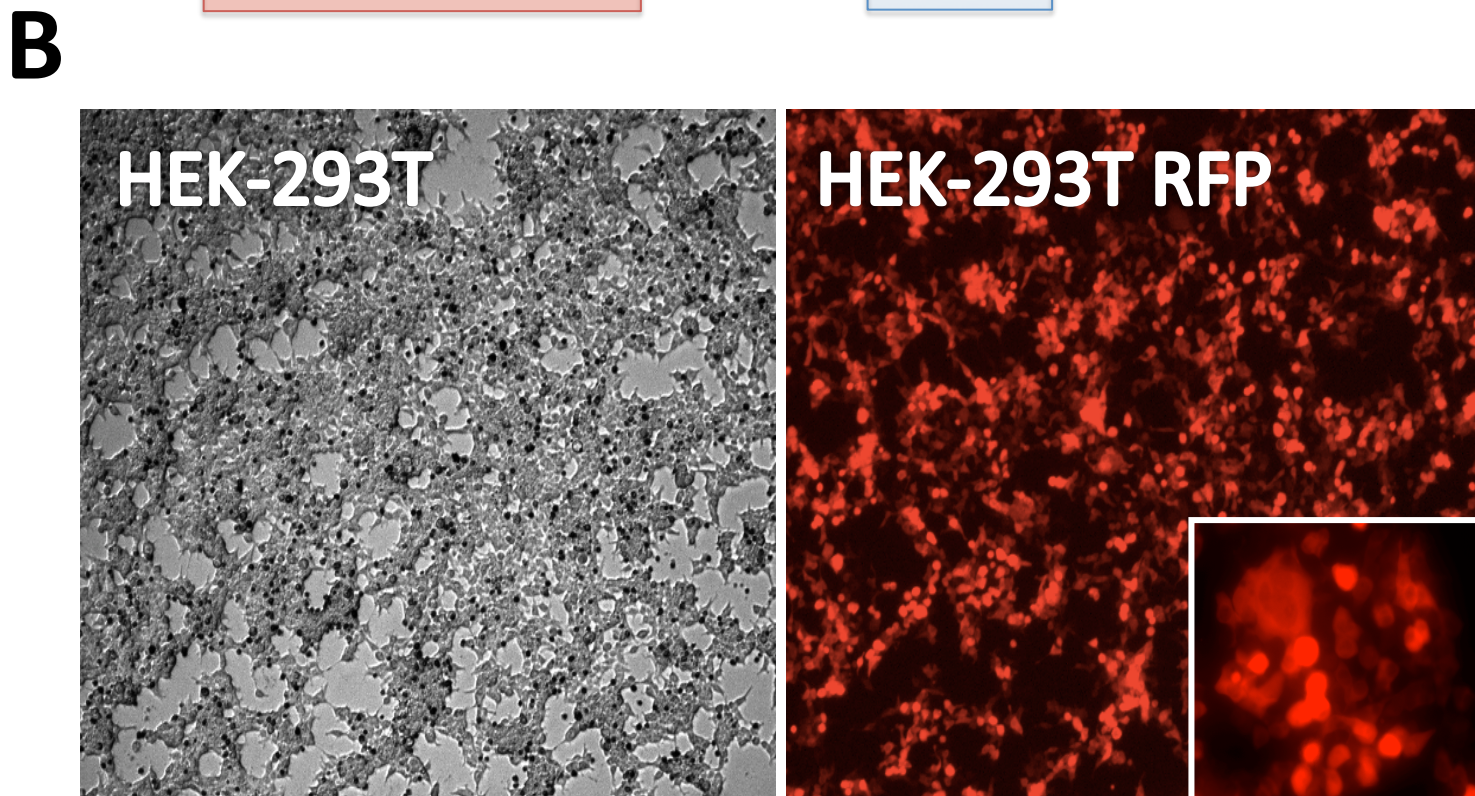

**Supplementary Figure 3.** Expression and splicing of pri-miRNA from pLIFE-miRNA vector (**A**) Top: Total RNA from HEK293T cells transfected with pLIFE-miRNA plasmid was extracted, and cDNA was synthesized using a polydT reverse primer. The second strand PCR reaction was performed using a forward primer that anneals in the open reading frame of RFP, and a reverse primer that anneals downstream of the 3' splice site in the 3'UTR. Middle: Gel electrophoresis depicts PCR of plasmid DNA and cDNA, with a shift of the expected size given proper intron/miRNA splicing. Bottom: Sequencing of the PCR products confirmed that the miRNA is properly spliced out of the RFP mRNA transcript (**B**) Bright field (left) and fluorescent (right) images of HEK293T cells used in the above experiment. RFP expression functions both as a marker for transfection efficiency, and signals transcription of the primary miRNA transcript.

**A****CMV Max-GFP + CMV-*dsRed2-miR-10b***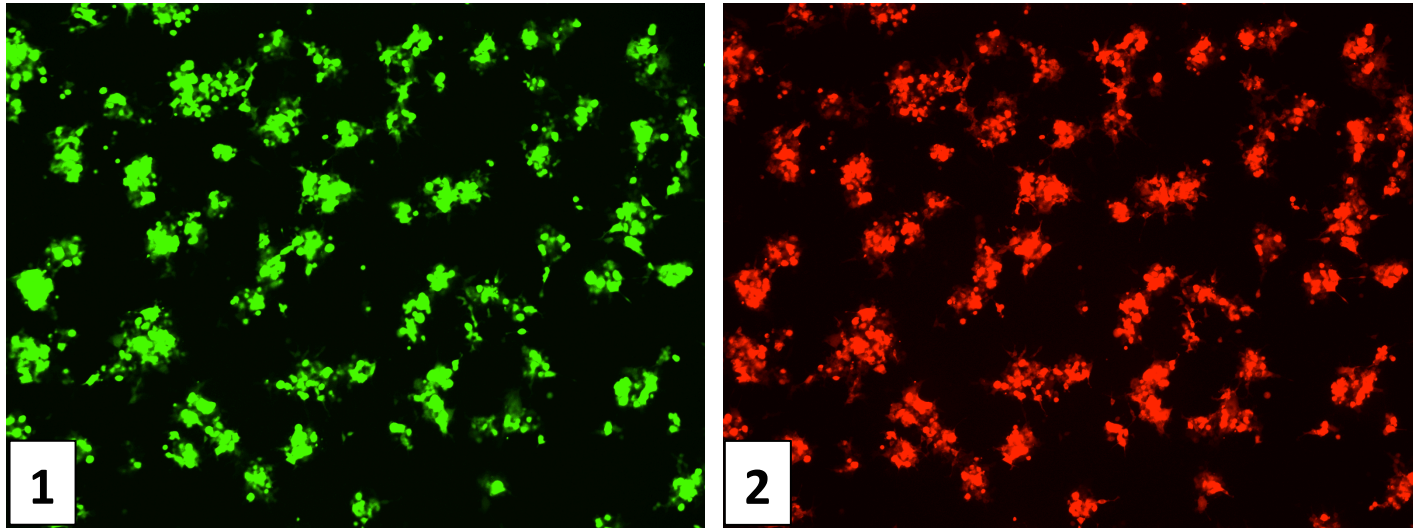**CMV Max-GFP + PGK-*dsRed2-miR-10b***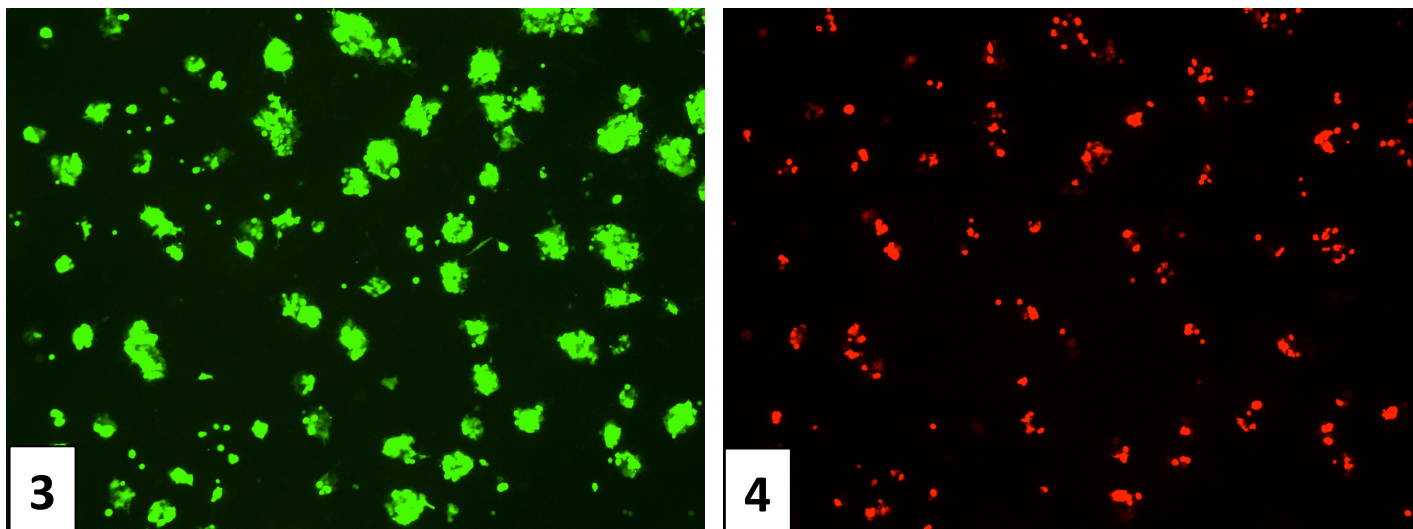**B**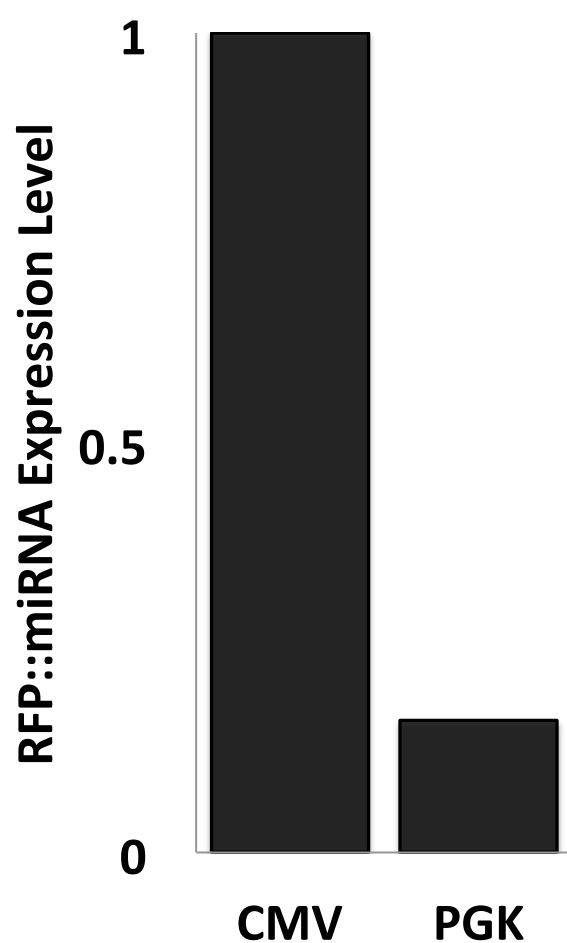

**Supplementary Figure 4:** PGK promoter is 80% weaker than CMV Promoter. **(A)** We have compared the strength of the CMV promoter related to the PGK promoter in co-transfection experiments using fluorescence microscopy. While the expression of GFP driven by a CMV promoter is constant in both experiments (compare panel 1 with 3), the expression of dsRed2 included in the pLIFE is much weaker using the PGK promoter (compare panel 2 with panel 4). **(B)** Quantification of fluorescence produced by these two promoters shows that CMV promoter is at least five times stronger than the PGK promoter, results comparable to those obtained by Qin, et al. 2010 (52).



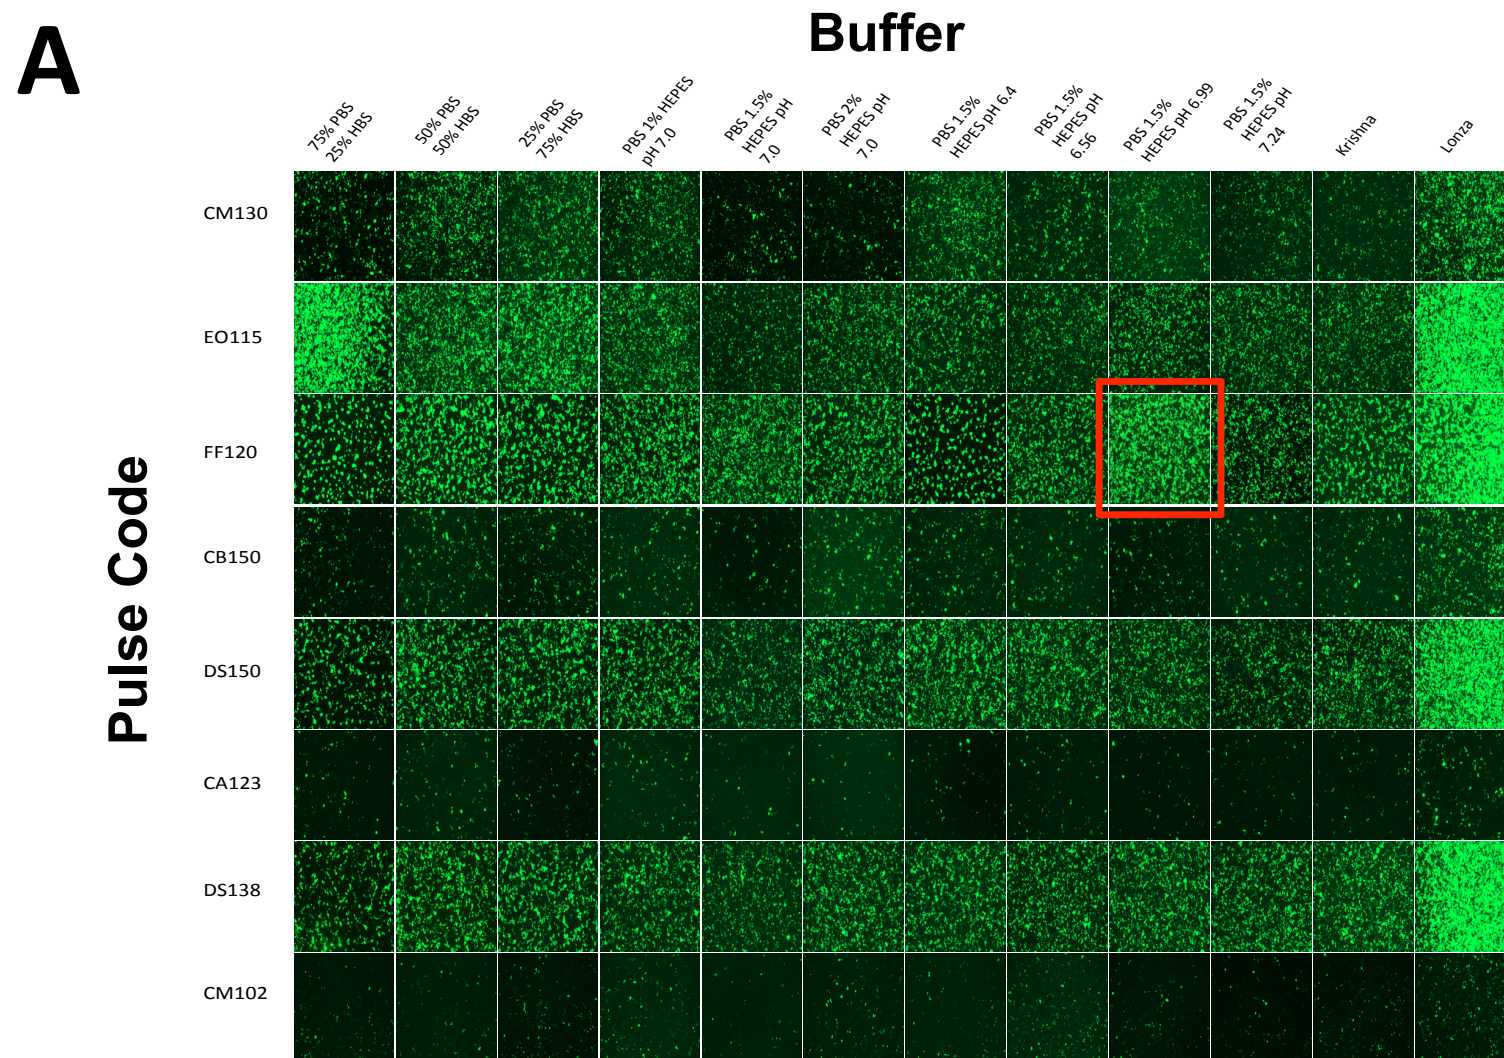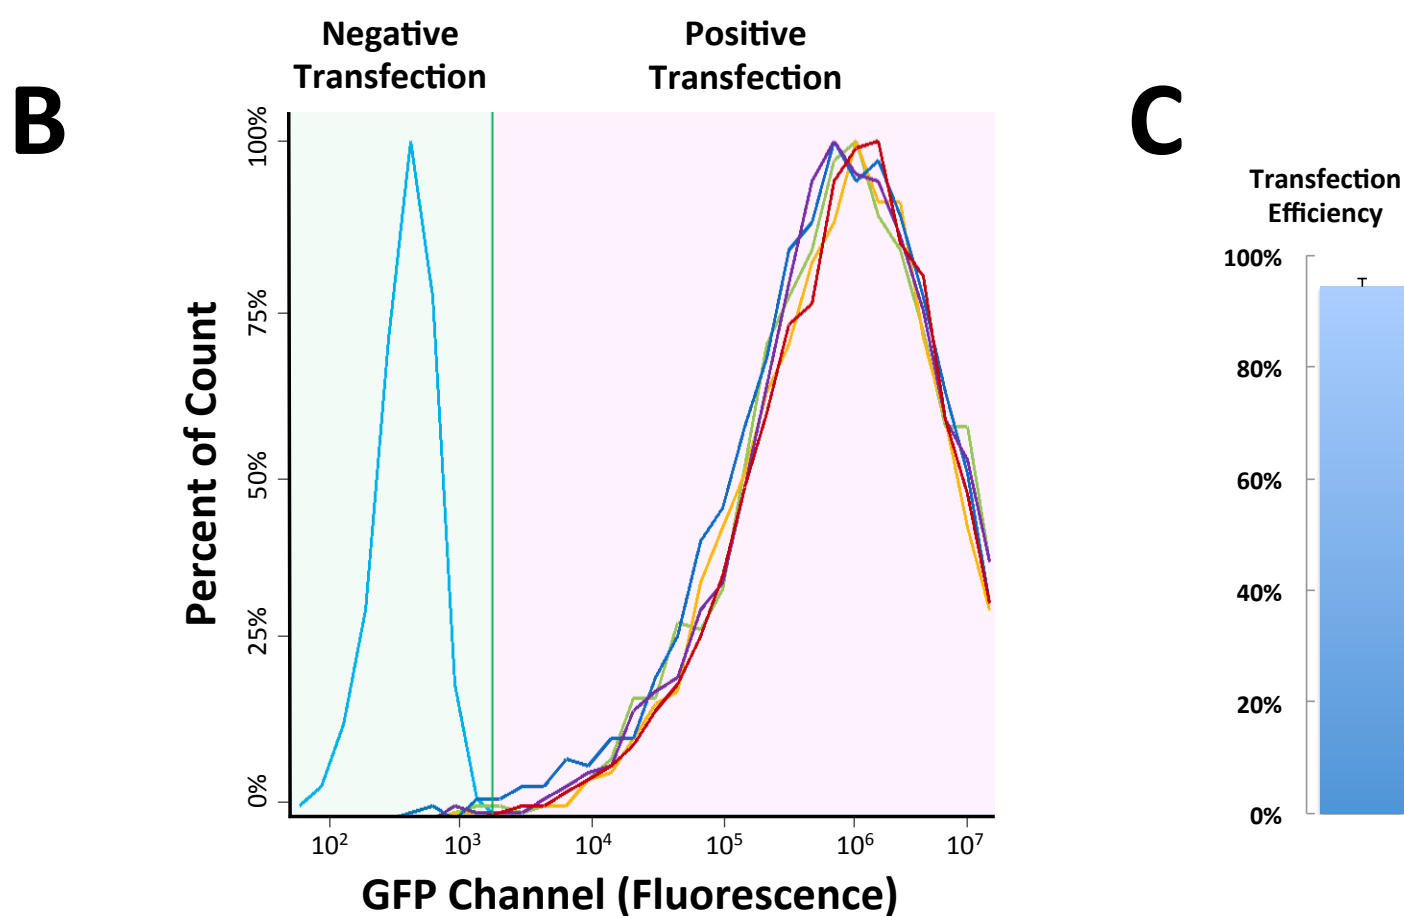

**Supplementary Figure 5.** Development of nucleofection transfection buffers. We tested 11 electroporation buffers against 8 different pulse codes. 100k HEK293T cells were transfected with 50 ng pmaxGFP plasmid (Lonza) and compared against the SF cell line solution (Lonza) (*data not shown*). **(A)** The highest performing buffers were each retested with various permutations of pH and buffer composition to determine optimal transfection conditions. Based on fluorescence and cell survival PBS 1.5% HEPES pH 7.0 and pulse code FF120 (red box) was chosen for the 3'LIFE assay. **(B)** HEK293T cells transfected with GFP in PBS 1.5% HEPES pH 7.0 buffer and pulse code FF120 performed in 6 replicates. Cells were cultured for 48 hours following transfection, and fluorescence was analyzed using flow cytometer. Light blue line is negative transfection control without GFP. The percentage of transfected cells is consistent between experiments. **(C)** Transfection efficiency of previous experiment (b).

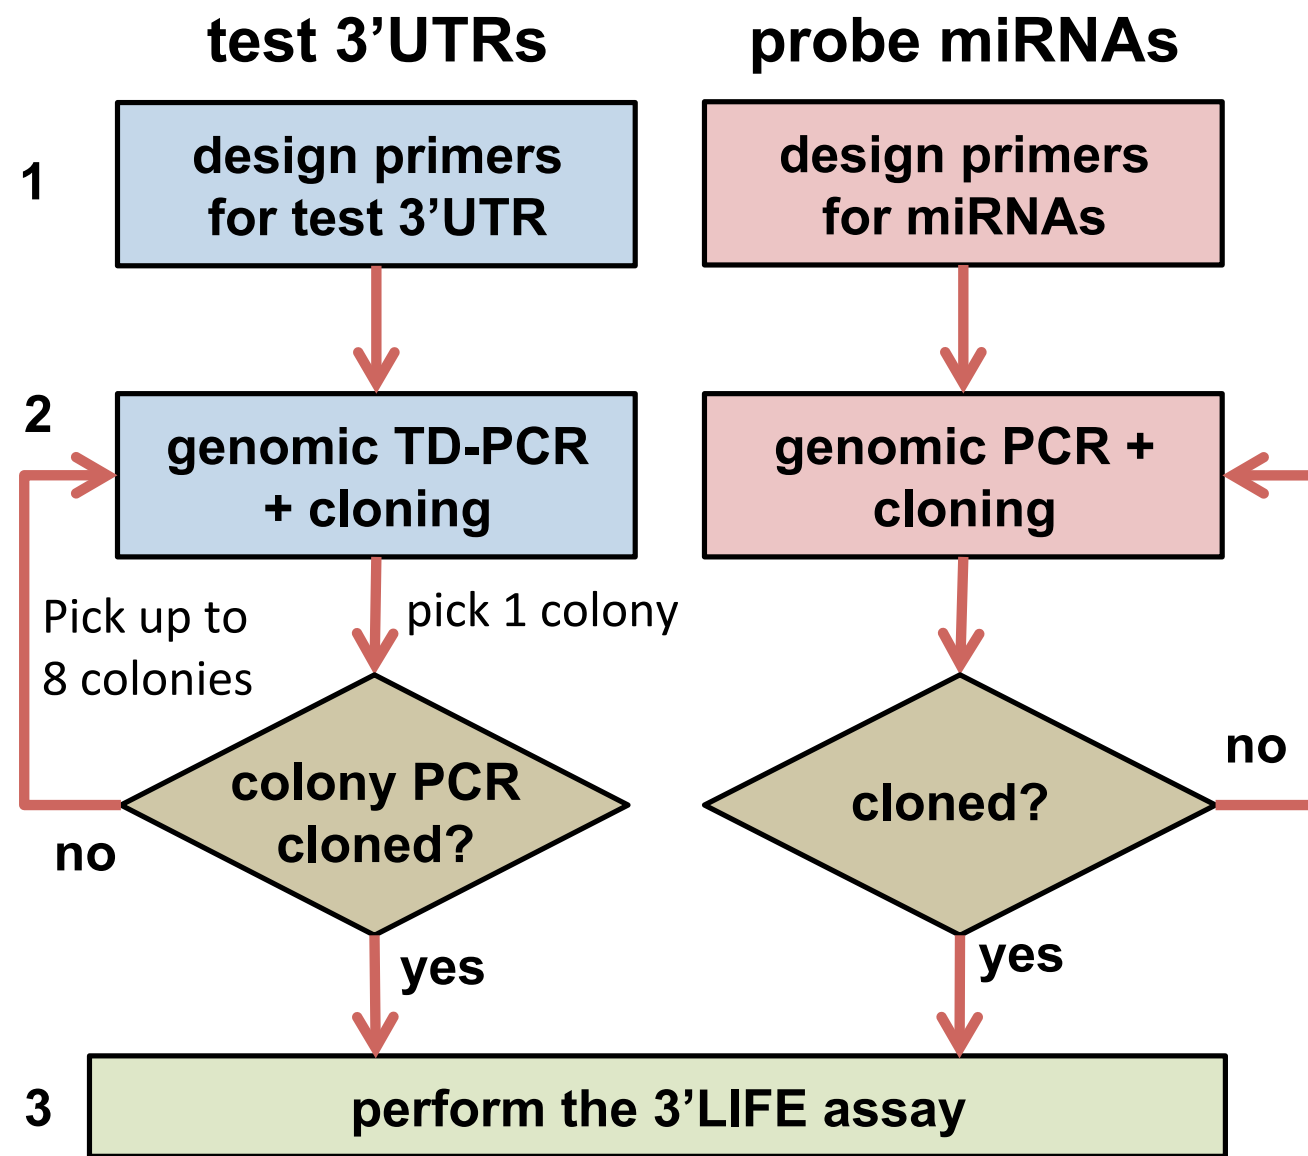

**Supplementary Figure 6.** 3'LIFE cloning pipeline. This cloning pipeline was used to clone the 384 3'UTRs, and the miRNAs used in the 3'LIFE assay. 1. Primers used to amplify 3'UTRs from the human genome anneal in the terminal exon of each gene and 150 nt downstream of the longest 3'UTR annotation in Refseq HG19 annotation. miRNA were amplified using primers that anneal ~200 nucleotides upstream and downstream from the pre-miRNA annotation from miRbase. All primers contain 5' universal Gateway elements to facilitate cloning in pLIFE Gateway compatible plasmids. 2. 3'UTRs were amplified using touchdown PCR cycling conditions (TD-PCR) in 96-well plates and used in BP cloning reaction. BP reactions were transformed in DH5 $\alpha$  cells and plated in 48 well culture plates. Screens for successful clones were performed using colony PCR and size based selection for one colony. If first colony was not positive, up to eight additional colonies were picked and analyzed using colony PCR. 3. Successful 3'UTR clones are re-arrayed into 96-well plates and tested for targeting by each miRNA in the 3'LIFE assay.

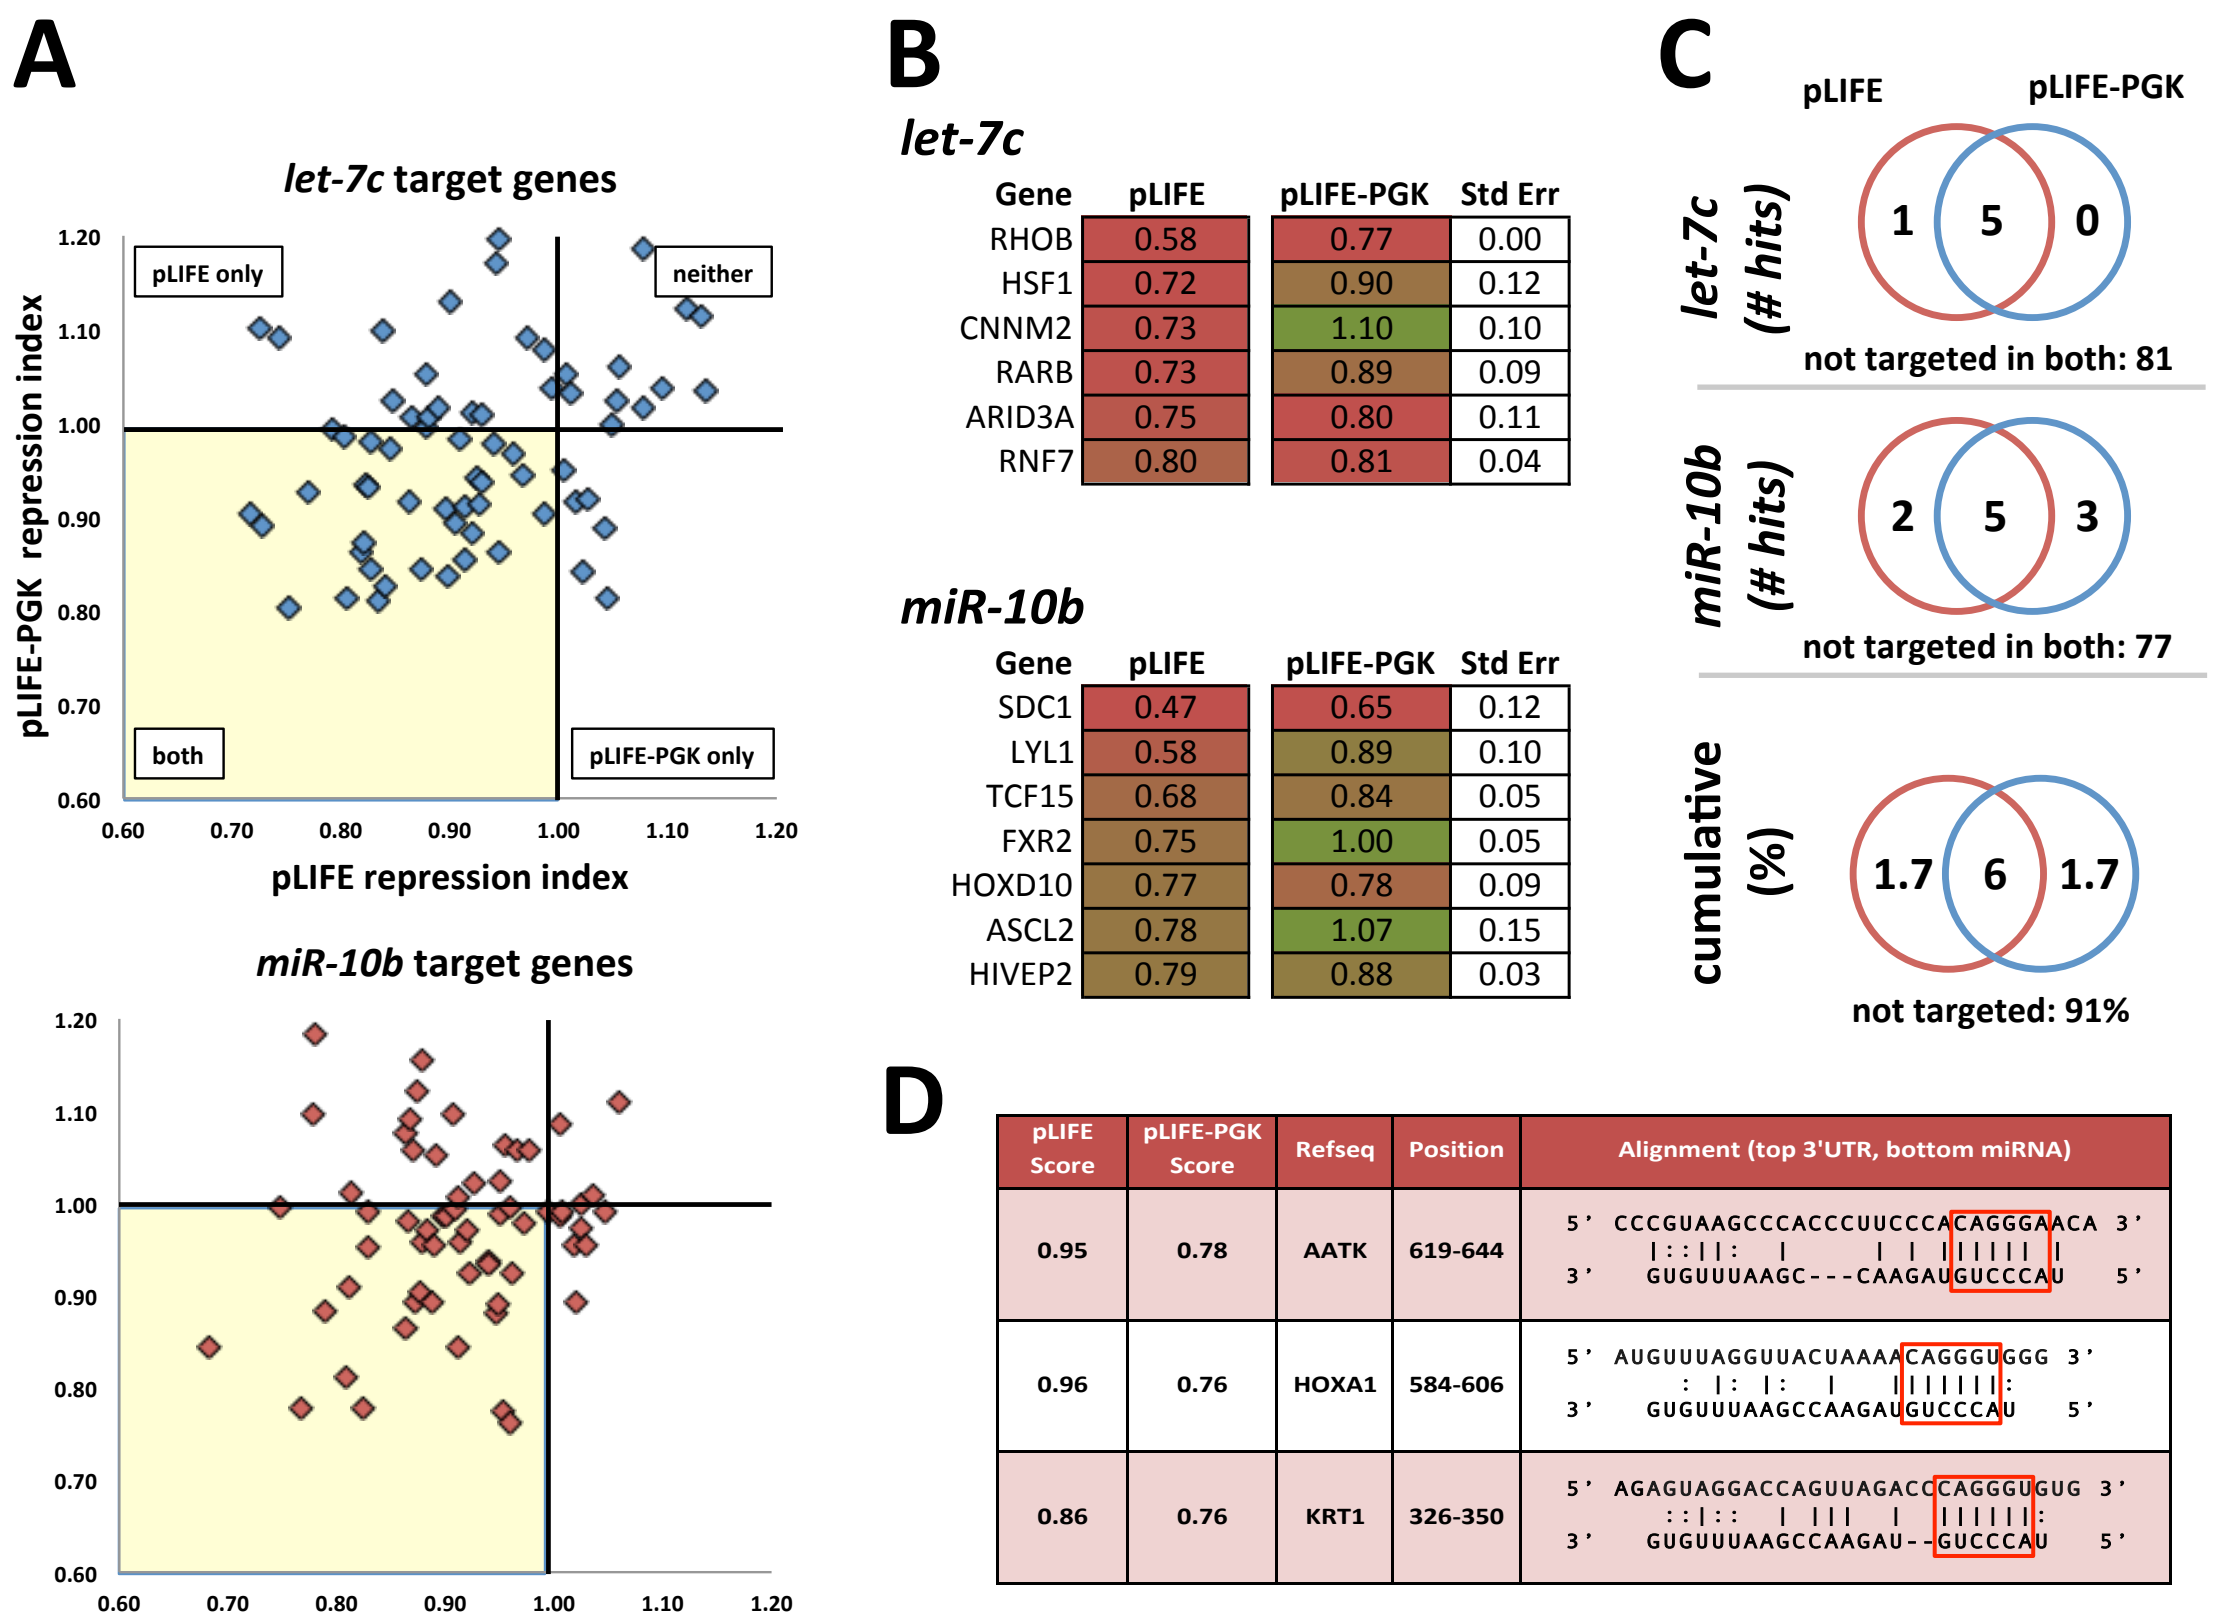

**Supplementary Figure 7.** miRNA delivered using both weak and strong promoters identify comparable targets. (A) Comparison of 87 genes screened in the 3'LIFE assay using pLIFE (strong promoter) and pLIFE-PGK (weak promoter) for targeting by *let-7c* and *miR10b*. The yellow panel highlights the repression from both miRNA delivery methods. (B) Top hits produced with pLIFE compared with hits produced with pLIFE-PGK. Of the top hits produced using pLIFE-miRNA, 77% of them were also repressed using a weaker promoter, but to a lesser extent. (C) Venn diagram showing the overlap between hits produced using both miRNA delivery vectors. 97% of genes were either repressed or not repressed using both vectors. (D) We studied the seed region in three statistically significant hits detected using the pLIFE-PGK for *miR-10b* that were not targeted by pLIFE (middle panel in C). Two of three have a perfect seed element in their 3'UTRs, suggesting that although at a low frequency (1.7%), some genes may exhibit dosage-dependent targeting.



**A**

| CLASH 3'UTR Target | Targeting miRNA | Target Region | Interaction Type | # of chimeric reads | 3'LIFE Repression Index | 3'LIFE p-value |
|--------------------|-----------------|---------------|------------------|---------------------|-------------------------|----------------|
| EZH2               | <i>let-7a</i>   | CDS, 3'UTR    | 7-mer            | 4                   | 0.75                    | <0.01          |
| EN2                | <i>let-7e</i>   | 3'UTR         | noncanonical     | 1                   | 0.77                    | <0.025         |
| CCND3              | <i>let-7b</i>   | 3'UTR         | none             | 1                   | 0.83                    | <0.05          |
| FXR2               | <i>let-7b</i>   | CDS, 3'UTR    | none             | 1                   | 0.85                    |                |
| HSF2               | <i>let-7a</i>   | 3'UTR (2x)    | noncanonical     | 2                   | 0.85                    |                |
| SNX6               | <i>let-7a</i>   | 3'UTR         | noncanonical     | 1                   | 0.91                    |                |
| NUP153             | <i>let-7b</i>   | 3'UTR         | noncanonical     | 2                   | 0.94                    |                |
| MYC                | <i>let-7b</i>   | 3'UTR         | noncanonical     | 1                   | 1.00                    |                |
| HES1               | <i>let-7b</i>   | 3'UTR         | none             | 3                   | 1.00                    |                |

**B**

*let-7c*: UGAGGUAGUAGGUUGUAUGGUU  
*let-7a*: UGAGGUAGUAGGUUGUAUAGUU  
*let-7b*: UGAGGUAGUAGGUUGUGUGGUU  
*let-7e*: UGAGGUAGGAGGUUGUAUAGUU

**Supplementary Figure 8:** Comparative analysis of 3'LIFE with AGO-HITS-CLIP. **(A)** In 2011, Kudla, et al. (PNAS), developed a method to isolate RNA:RNA interactions using immunoprecipitation approach, followed by ligation of the two complementary RNAs, resulting in a chimeric sequence composed of the two interacting RNAs. Recently, this technique, termed cross-linking and sequencing of hybrids (CLASH) was applied to the AGO protein and miRNA:mRNA interactions (50), providing a potential solution to the issue of identifying which miRNA is targeting the mRNA footprint obtained from original AGO-HITS-CLIP approach. The CLASH dataset was also conducted in HEK293T cells, which provided a complementary approach to cross validate hits obtained from 3'LIFE. We compared our results with this dataset. Unfortunately, of the 272 chimeric reads obtained for *let-7c* and *miR-10b*, only one gene was present in the 3'LIFE library (EIF3A), and the target footprint mapped to the open reading, thus was not comparable to 3'LIFE. However, CLASH did identify 21 genes which were targeted by a family member of *let-7c* or *miR-10b* which were included in the 3'LIFE library. **(B)** Alignments of *let-7* family members shows that these miRNAs share identical seed regions (red box), and diverge by 1-2 nucleotides in the 3' end of the miRNA (yellow boxes). Of these 21 genes, 12 mapped to coding sequences, while 9 mapped to 3'UTRs. Of the 9 overlapping 3'UTRs in the two datasets, 3 of them were significantly repressed in the 3'LIFE ( $p < 0.05$ ). Of these 3, the gene with the highest repression in 3'LIFE, EZH2, was the only gene with a canonical seed target identified by CLASH and had the highest number of reads sequenced by CLASH. The remaining eight genes had either non-canonical, or unidentifiable target sites. The only gene with canonical seed was the top hit in both 3'LIFE and CLASH, and 7 out of 9 CLASH hits have some degree of repression in 3'LIFE, although only 3 significantly. While there may be subtle differences in miRNA targets by closely related miRNA family members, this comparison suggests that binding (as shown by CLASH) is not an accurate proxy for functional repression (as shown by 3'LIFE).



Supplementary Table 1: Primers used for cloning

| Alias   | RefSeq ID    | Forward Primer                  | Reverse Primer                 |
|---------|--------------|---------------------------------|--------------------------------|
| AATK    | NM_001080395 | GGTGAGAGTAAAGAGGCTTGA           | CCTCCACCGGGGTGTGCC             |
| AKT1    | NM_005163    | GCCAGCGGCACGGCCTGA              | ACACAGCCTGTCCCAAAC             |
| ALX3    | NM_006492    | CTGAAGTGGACCACGTGA              | CCTTTACACCCTCCTTAGTGTGACAG     |
| ANXA7   | NM_001156    | CTGGCTATTGTGGGCCAGTAG           | CTGAACACTTAAAATTTGCTAAGGTAGTAG |
| APC     | NM_000038    | TTCTGGGTCTTACCTTGTGACATCTGTTTA  | ATTTGAATTAAGGCAAGTTTATCTAATT   |
| APPL2   | NM_018171    | GCAGAATCCGAAGCATAA              | CTACTCATGTTGACTGGAAGTATTTTTTGA |
| ARID1A  | NM_139135    | TGATGTACTGTTTTGATTGGCCAGTCATG   | TTTTGGAATAGTAAATAAATGACAGGGT   |
| ARID3A  | NM_005224    | CACATCTACCTCAAATAACTCGTTGCCTTA  | AGTTCATTGGCTCCGCGG             |
| ARID3B  | NM_006465    | CACCAGCTGGTCCCTCTG              | TTGAAGAAGGCGTGGGTGAAG          |
| ARNT    | NM_178427    | CTAATATGTTTCCCCCTTTTTCAGAATAG   | AGCCAAGATCGTGCCACTG            |
| ASCL1   | NM_004316    | CGACTTCACCAACTGGTCTG            | TGGATGGGACTGGCCATAGC           |
| ASCL2   | NM_005170    | TGGTTAGGGGGCTACTGA              | CAAGGTGTCCCAATGGCTCC           |
| ASXL1   | NM_015338    | TGTATTGTGCCTTGTGGTGAGATA        | TAACCTCCAAAAGAAGAGCTCCAAGTATA  |
| ATF1    | NM_005171    | GAAGGATCTTTATTCCAATAAAAGTGTGTTG | TCATAAAGTGCTGCCAAGTCAACAGA     |
| ATF3    | NM_001674    | ACAGATAAAAGAAGGAACATTGCAGAGCTA  | ACTATCCCATCTAGTGTGCCCAA        |
| ATF5    | NM_012068    | GAGGACCCGTAGCTGCTA              | GTATTTTACAGTAGAGATGGGTTTCCACTT |
| ATOX1   | NM_145178    | TTCCAGATGGCCACCTAG              | TCTCATCAGCTTTTGGAGAACTACTACAA  |
| ATXN2   | NM_002973    | CACCAACAGCAGTTGTAA              | TCTAGAGATACCTGAACCAGAACTAAGGG  |
| BAG2    | NM_004282    | GCAACAAAATGCTGAAAGCAGATTCAATTA  | TTTGTATATCAATAGGACTAGTTACTTTGA |
| BAG3    | NM_004281    | TAACCCAGCAGCACCGTA              | CAATTCTCTTTGAGCCGGGCTATT       |
| BAZ2B   | NM_013450    | AAGTGGACAGATACTTTCAAAGTGAGCTGA  | ACTTAAACTCACCTCTTCCACCCA       |
| BCCIP   | NM_078469    | GTCTGTTCCCCCAGTATTAGAATA        | CACCAATCTATATATAGCCTTATCCACAA  |
| BCL11A  | NM_018014    | TCGAGAGCCCTTAAGTTCTGA           | TCTTCTACTGATGTGGCCTCTGG        |
| BCL2L1  | NM_001191    | TCACTCTTCAGTCGGAAATGA           | TCACCGTACAGGTGGATAAATTCAG      |
| BCL3    | NM_005178    | AGTCCAGGAGGCAGCTG               | AGAAGTCCAGAGTGACACACAG         |
| BCL6    | NM_001706    | CTCCCAAAGCCTGCTGA               | ACCTAGCCTCATCTCAAAGACGC        |
| BHLHB9  | NM_001142530 | GGAAGTTAAAGAGATTATTGAAACAATGTA  | TAAGTGTTAAGAGGAAAAGGCAAGTCTCAA |
| BHLHE22 | NM_152414    | ACAGTGCACGGAGAAGCCTTA           | TAAACAAGTAAATTAGGGCTACTTCTAATT |
| BICD1   | NM_001714    | CAAGCCTCCTCACCCCTA              | ATGTCCAGTGAAGAAGTCTAGTAAAAATA  |
| BMI1    | NM_005180    | ATCAGCAACTTCTTCTGGTTG           | TTAAAGTTTTAGCCTTTTAAAAATATTTT  |
| BMP2    | NM_001200    | GGGTTGTGGGTGTCGCTA              | TGACTTATCAAATAACTTGCTGCAATTTT  |
| BMP4    | NM_130850    | GGATGTGGGTGCCGCTGA              | TACTTCTGTCCCTACAACCTAACCAC     |
| BMP6    | NM_001718    | AAGAGCTTGTGGATGCCACTA           | ACTTTGCATCCAACACTCTTACC        |
| BMX1    | NM_004329    | GATGGTTGAATCCCAAGATGTAATAATCTG  | GATGTGATATAATCACATTTATTTTATGTT |
| BRCA1   | NM_007299    | AATTGGGCAGATGTGTGA              | CAGGAAATACAAAAGGTATTTAAGCTGCCT |
| BRCA2   | NM_000059    | GGACACAATTACAATAAAAAATATATCTA   | ACAAAGCAAGACTCCATCTCCAAAAAATA  |
| BTAF1   | NM_003972    | CCTGGAAAATTTTATGCATTCTCTCAAGTA  | TAAAAAATATTCAACTCAAATATACTGAA  |
| BZW1    | NM_014670    | ATCTGAAGCTGAAGAAGGTGACTG        | TTTAGCTACACCAGAATTCTGTGTAGGTGG |
| BZW2    | NM_014038    | AGAATCCGAATCGGAAGGTGAGGAAAATTA  | CTGGGATTACAGGTGTGAGCAGAATAG    |
| CASZ1   | NM_017766    | CTCCAGTTCAGGAGAAGTGA            | ACTCTGACCAGGCCAGGGAA           |
| CCND3   | NM_001136017 | GATGTACAGCCATACACTGTAG          | GAAGTACTATATTTGGGTCAGAGACCATG  |
| CEN2    | NM_057749    | GAAAAACCAACAGGAAACACTAA         | ATTTTTGACACACTCTAATAACATCACTT  |
| CDC25A  | NM_001789    | TACAGTCTGCTGAAGAAGCTCTGA        | TCTTGCAAATCAATCTGAACCACAAGTTTT |
| CDK4    | NM_000075    | CTACATAAGGATGAAGTAATCCGGAGTGA   | TTCCTCTGTCCATATACTGGATCACCT    |
| CDKN1A  | NM_000389    | CTTCTCCAAGAGGAAGCCCTA           | CTGTTGTTTTTGCAGCAGTCTTTCTGTTT  |
| CDKN1C  | NM_000076    | CGCAAGAGGCTGCGGTGA              | TGGGCCAGGCCAGCCAG              |
| CDKN2C  | NM_001262    | GGGAGCCACAAATCTTCAATA           | ATCATCAAGAGAGTATGTCTAGTTTTCCAG |
| CDKN2D  | NM_001800    | ATGGTGGCCCGCTGTGA               | CCCAGCTCACTCACCCCTG            |
| CDNF    | NM_001029954 | CCCAAAACAGAGCTCTGA              | GAAATGTTTTTTCAGTATTTCCAGCTGTA  |
| CDPF1   | NM_207327    | CCCGTTCTCGGACTGTA               | TGGAGGCTGTCTCCACT              |
| CDX1    | NM_001804    | GAAAGAGGAGTTTCTGCCATA           | GCTTACAAAATGGACTCACATTTTTACGTA |
| CDX2    | NM_001265    | CCCACCGTCACCCAGTGA              | GAGCCACGCATTCCAAGGC            |
| CERS2   | NM_022075    | CTCAATAACAACCATCGTAAGAATGACTGA  | CCAGCTAGATGATTTTTAGTAGAGATGGG  |
| CHMP4B  | NM_176812    | GAAGTGGGCTGGATCCATGTA           | ACTTCTGGTGTGAGACAAGCTCTGC      |
| CNNM2   | NM_017649    | CAACGAAGGCGCCATCTA              | AGAAAACGCTCTCTCTTTTCTAGTGTAT   |
| COPS6   | NM_006833    | GCGCGGGCTCTTTTTCTG              | GCTGCCTCTCCAAAATATGTAGTAAACG   |
| COPS8   | NM_006710    | TTATGTGGCTTTCTTGAAAACCTG        | CTCCTGATCCTCTGACTTCTTGAATTC    |
| CPLX1   | NM_006651    | CAGGACATGCTCAAGAAGTAG           | CTGGACGGCCTAGGGAAAATG          |
| CREB3L3 | NM_032607    | GGCCGGAGACGAGCTGTG              | TGCCCGGCCCTCTCCCT              |

|         |              |                                 |                                |
|---------|--------------|---------------------------------|--------------------------------|
| CREB3L4 | NM_001255981 | GCATGCAGATGAGATGTG              | GGTTTCCTTCCCTTCTGTAACCTGGA     |
| CREG1   | NM_003851    | TAATTTCTTCTGTTCCCTTTCTAGGTGA    | GCTTTTTGCCAATTAGAAAGAGTGGTATTA |
| CREM    | NM_182721    | CAAAGATCTTTATTGCCATAAAGTAGAGTA  | TCTCCACACACACTGATCAGAT         |
| CRK     | NM_016823    | CCCGATGAGGACTTCAGCTGA           | AGGAATCCTTAGGACTTGAGTAGCG      |
| CTCF    | NM_006565    | CAGCATGATGGACCGGTG              | CCCGCCAAGATCATATCGTCC          |
| CTF1    | NM_001142544 | GCCCCGGGGCTCGGCCTG              | GGGCTGGCAGAGGGCACC             |
| CTNNB1  | NM_001904    | CTGTTTTGATACTGACCTGTA           | AAGTAGGGCCCTCTCTATCGCTA        |
| DEC1    | NM_017418    | GCTTTTTTTTTTTGTCTCCAGCAGATTG    | AGACCAAATCTTGAACCAGAATAGGCA    |
| DIDO1   | NM_022105    | GGAGTTGCAGCTTTGTGTTAA           | TGCTTGCCTGCATGAGTG             |
| DLL1    | NM_005618    | GTGGCCCCCAGGTGTAA               | AGGAGAGGAACGGGCTGCT            |
| DLL4    | NM_019074    | CGTTTCTCCAGGTATA                | ACATGCCAAATCCAAGTGTCTGC        |
| DLX1    | NM_001038493 | GGCGGGCTCTGGAGGGTA              | CTGACGATACCCTGGTGTCTG          |
| DLX3    | NM_005220    | CCTGGGGCTGTGACTGA               | GGCCAGGCCAGCCAGC               |
| DLX4    | NM_001934    | TTCGCTCAGATGATGTG               | ACAGAGCTAGTTAGTGGCCAAGACAA     |
| DMRT1   | NM_021951    | CATCGAGGAGGACGAGTG              | GCATTTAATAAAAAACAAGATGGTCAGTT  |
| DNMT1   | NM_001379    | GAGGAAGCTGCTAAGGACTAG           | AGTTCTGAACAAACACAGACAGACACA    |
| DNMT3B  | NM_175848    | GAAGGACTACTTTGCATGTGAATA        | TAAGCTCCAGTCAGCTTGGGG          |
| DOCK11  | NM_144658    | CCCAAGATACGCTGAAGTGTG           | CTAATTGGCAAGGATTCAAATGATCTCCCC |
| DONSON  | NM_017613    | AGAGACTACATTATAATTGGAGATCCTGA   | TACAGTGGTATTATATGCTATGTCTCTAA  |
| DPF1    | NM_004647    | GCTTACATCACCTCACCTAG            | CAAAGCCGGGGAGAGGCA             |
| DPF2    | NM_006268    | CTACCAGAACCAGAACTCCTCTTG        | CATATTGGGGTTCACAAAAAATTTAAT    |
| E2F1    | NM_005225    | ACCCCTGGATTCTGA                 | AGCCCACTGATTTGTTACATGTTTACTAA  |
| E2F4    | NM_001950    | TGATGTGCTGTCTCAACCTCTG          | CCCGCCCCACCCAAGT               |
| E2F5    | NM_001083589 | TCTGTTTGTGTCAGATACTAAATTATTA    | TATTGTTGTCTGTGTTTTTAATATAATAC  |
| E2F6    | NM_198256    | AGTGAAGAATTGCTTGAAGTAAGCAACTGA  | GGATCGCTCAAGGTTTCTGAAGGAA      |
| EBF4    | NM_001110514 | GGCCTGGCATACTCCTA               | CCAACAGTCCCAAGAACAGAC          |
| EBP     | NM_006579    | AAAAGCCAAGAGCAAGAAGAACTG        | TCTGGCGGGGGTCACTG              |
| EGR1    | NM_001964    | CTTTTCTCCAGGACAATTGAAATTTGCTA   | ATACTCAGTCTCATAAATAACGAACCTCCA |
| EGR2    | NM_000399    | CGGACCCGGACACCTTGA              | CAGGCTAGCAAAGAAGATCTGGAGA      |
| EGR4    | NM_001965    | TCCTTCGCTTCTCTCTGA              | CGCAGTTCCTGGCAGGTGT            |
| EHMT1   | NM_024757    | TGCCCGGACCCCTATG                | CTGCCTGGAACGTCCTCT             |
| EHMT2   | NM_025256    | CCCCCTGTCAACACATGA              | CATAGTGGCCCCCACCT              |
| EIF3A   | NM_003750    | GGATGGACCACAGTACGACGTTAA        | TCCTAGCCACATATGCTTTCTTTGTTATAT |
| EIF3J   | NM_003758    | ATATGTACAAGACTATGAAGACTTCATGTG  | TTCCTATTTAAATAGATTGATTTTAGATG  |
| EIF4A2  | NM_001967    | CATGAATGTGGCTGACCTATTTA         | GCAGATGGTGTGATGAACATTTG        |
| ELF1    | NM_172373    | CTGCTGGAACCAACTCTTTTATG         | TCTCAAAAACAAAACAAAACAAAAGTGTG  |
| ELF2    | NM_201999    | ACAGAAGGACTAGTGACATGTGAGAAATAA  | CAAAAGGCTGATTGTGAAACAAATGGTTT  |
| ELF3    | NM_004433    | GGTTCCTCAGAGTCGGAACCTG          | TGTAAGTAAAAGCCTTTTCCAAATGGCTC  |
| ELF5    | NM_001422    | CAGGAAGACAAGCTATGA              | CTTGGGCAACAAGCAAGAACC          |
| ELK1    | NM_005229    | GGGCCCCAGAAGCCATGA              | GATATGCAGTCCCTACTATTGTTTCTCACA |
| ELK3    | NM_005230    | ACTGCTTTCTTCAAACCTCTCAGAAATCCTG | CCTGGAATAGCATGAACTTGATGTAGCTTT |
| EMX1    | NM_004097    | CATCGATGTCACCTCCAATGACTA        | GGTCTGGATGTCGTAAGGGAAAGACTTA   |
| EMX2    | NM_004098    | GGAGGAAATAGACGTGACCTCAGATGATTA  | ATCTTTCTTTAAATGCCTGAGAATCCATC  |
| EN1     | NM_001426    | GACAAAGACGAGAGCGAGTAG           | TCTGGGTGCGCTTCCCC              |
| EN2     | NM_001427    | CAAGTCGGACAGCGAGTA              | TAATAATCACCTCTCGCTACAAGGCA     |
| EPHA8   | NM_020526    | GCCCCGCCGGCACCTCTG              | GCACTAATCCTACCTCCCCAGACA       |
| ERBB2   | NM_004448    | TCTGGACGTGCCAGTGTG              | CCCCAACCTGAAGCTGGA             |
| ERBB3   | NM_001982    | GGCTAATGCCAGAGAACGTA            | GTTGTTCTAAAGAAATAGAAGTAATAGTAG |
| ERF     | NM_006494    | GAGCACCGAGACTCCTGA              | GCCTGGATTTGGCCATTCTGATTA       |
| ESR2    | NM_001214902 | AAGCAATTCATTCATTTGAAGTTATCTTAG  | GGTTTCGCCATGTTGGCCA            |
| ETNK2   | NM_018208    | TTGGAGATGCCAAAGTGA              | CGGAGCTAGGTGCACAGGA            |
| ETV3    | NM_005240    | AAGATACAACTCTTTTGGTAGGGAATTA    | GAAAACAGTTAAATACAATCTACAGTAGTC |
| EZH2    | NM_001203247 | GAAAGAGAAATGAAATCCCTTGA         | CAGTGTCTTCATATATGTCTCCACATAT   |
| FAP     | NM_004460    | CTAAAGCAGTGTCTCTTTGTCAGACTAA    | GAGTTCTCATGACAGAAATCCAAACCACT  |
| FHL1    | NM_001449    | CTGTGCCAAAAGCTGTGA              | TGTGGTTTTTACAGGTTTGTTTATAATTCC |
| FIZ1    | NM_032836    | CACCGGGCATGGACTGA               | AGCCTAACCGACTCTAATTTAAAGGG     |
| FOS     | NM_005252    | CACGCTGTGGCCCTGTG               | TAAAATCAGCTCTATAGTTTCTTGTCTCTC |
| FOSL1   | NM_005438    | ACCCTCTCGCTTTGTGA               | GCGGATGTAGCCCCACTTGT           |
| FOXA1   | NM_004496    | CCCGTCTAAACACTTCTCTAG           | ATGCAAAATAGCGGCTACCTTAAATGT    |
| FOXA2   | NM_021784    | CCCATTATGAACTCCTCTTAA           | TTGAAGTGGATTTAGAGAAATAAGATGGAT |
| FOXC1   | NM_001453    | CGTCTACGACTGTAGCAAGTTTTG        | CCAGCGAGATTTAAACGGGGC          |

|         |              |                                 |                                 |
|---------|--------------|---------------------------------|---------------------------------|
| FOXD2   | NM_004474    | TAGTGGCTGCCACTTCTG              | CTTGCATCCTCTAAGCTCAAACCC        |
| FOXE3   | NM_012186    | GCTGGAGCGCTACCTGTG              | CCTGCTGGAGAATCACTTCCTAATC       |
| FOXI1   | NM_144769    | GGAGGGCACCGAGGTCTA              | AGAGGTGAAAAGAGTCTTGATATGCATTCT  |
| FOXL1   | NM_005250    | CACGGTACTCCACTTCCAGTA           | TCTCCACTCCTTCCCCTCCAT           |
| FOXL2   | NM_023067    | TCGCGCTCGATCTCTGA               | ACAAAGCAGCAGCGACAG              |
| FOXM1   | NM_021953    | CAGTTTATTCCTGAGCTACAGTAG        | TGTGTGCCTGTGCAAGTGCT            |
| FOXN1   | NM_003593    | GCCCGTGGCCCTGGCATG              | TTTCTGGAGGAGGAGTGAGATTGTG       |
| FOXO4   | NM_005938    | GTTTCTTCTTCCACAGATCCCTG         | CTCCACCCCCACACTCCA              |
| FOXQ1   | NM_033260    | GGAGACGCTCCTAGCCTG              | GGAAATCTGCAAGCCATTCTATAATACCT   |
| FST     | NM_006350    | ACACAAGAGCGCTTTTTATCTAATTTTCAGG | AGTCAAGGTTCTTGTAACAAAACCC       |
| FUT8    | NM_004480    | CACATATCCTGAGGCTGAGAAATA        | CAATTTAGAAAGAAAAGAGACTAACTTAAT  |
| FXR2    | NM_004860    | TTGGGTAGTATGGTGAATGGGGTTTCATAA  | TTCCAGAAAGTAAGACCATCTTTGGG      |
| GATA2   | NM_032638    | GTGACCGCCATGGGCTAG              | TGGCAAAATCAGACCCAGGC            |
| GATA3   | NM_002051    | GGTCACCGCCATGGGTTA              | GACGTTGACTCTCTGGGGTTAGC         |
| GATA6   | NM_005257    | CGCCCTGGCCCTGGCCTG              | CACTGGCTATGGACTGTCCC            |
| GCFC1   | NM_016631    | GAATTTAAGTCTTTGATCGAAGGAAAATAG  | AAGATAAAATTAACAGAGCAAATACAGTGC  |
| GCM2    | NM_004752    | TTCTTTACCTACAACAATGAGGATTTTTGA  | ACAACGTTTCCCAGGTCATAATATGAACA   |
| GGNBP2  | NM_024835    | GACAACGGCTGGAGCAAATTA           | CAATTCTCATCAAAGGAAGATTTTTGTCTT  |
| GNAI1   | NM_002069    | AAATAATCTAAAAGATTGTGGTCTTTTTA   | CCAAATGTGGCATCACATCTCATAGCT     |
| GNAI2   | NM_002070    | GGACTGCGGCCTCTTCTG              | TGAAGCTCAGAGCGTGGG              |
| GNAQ    | NM_002072    | TTGAACCTGAAGGAGTACAATCTGGTCTAA  | AACAATGTCATCTTAAGGACAAAGAAAAGA  |
| GTF2H1  | NM_005316    | CGCTGTATGAAGAAAACGTG            | GCATGTGCTACCATGCCTG             |
| GTFF21  | NM_001518    | ACCAGACCCACGTGGTA               | TCTGAGAAAACCCGCAAGTGG           |
| HDAC1   | NM_004964    | GGAGGTCAAGTTGGCCTG              | AAACCTCAAGGGAGGAGTTAAGGC        |
| HDAC3   | NM_003883    | AATGACAAGGAAAGCGATGTGGAGATTTAA  | AATAATAAATGTAGAATACATACACAGGGC  |
| HDAC5   | NM_005474    | CAGGAGCCTGCCCTGTGA              | TACAGGACAGATCTTGGCC             |
| HDAC6   | NM_006044    | TATGCCCCACCCACACTA              | TTCAGTTAGTTTTTTGGGGCAATGGA      |
| HES1    | NM_005524    | GAGGCCGTGGCGGAAGT               | TAGTTTCATGGAGGATTGGTAAAAGTTTGA  |
| HES5    | NM_001010926 | CTCTGGCGGCCCTGGTGA              | GACCCACCCCTTCTTCCG              |
| HES7    | NM_001165967 | TGGAGACCTTGGCCCTGA              | AAGTAAGGAATGGGGCAAATCTTAAGAGTG  |
| HHAT    | NM_018194    | GACCTACGCCACGGACTA              | GCACCACCATTAGAGTAACATAAGATTT    |
| HIF1A   | NM_181054    | CTTAGGTATCTCTTTTGTTTTTCAGATTTA  | TACATTAAGGTGATGGCACTAAGATAAATG  |
| HIVEP1  | NM_002114    | CAGGCTTGTGATAGCAACCTG           | TTTACATGGTAGAAAAGGCGAGTAAAGTCT  |
| HIVEP2  | NM_006734    | CCTTCATCAGAAAAGAGTCAGCTACATTGA  | GACTGTCTTCTCACTTGTTAAAAGCATTCA  |
| HLA-E   | NM_005516    | GTCTGAGTCTCACAGCTTGTA           | GGGATTCACCAGGAAAACGGGAAA        |
| HLTF    | NM_003071    | AATGAAATCAGAACATTAATTGACTTATAA  | AATTGAGCAAAATAAAGTTAGTTAGGATAT  |
| HLX     | NM_021958    | CGCGCTTGGCTGCTTATA              | TGTCTGTAACAAGATGGCTCTGAGGT      |
| HMBBOX1 | NM_024567    | GGCCCTGGATGATGACTG              | AAAAAGAAGCCGTGCTTAACATCCA       |
| HNF1A   | NM_000545    | GGCCTCTTCTCCAGTA                | TAGAGTCTCAGCAGAGCAAGAAAAGC      |
| HOXA1   | NM_005522    | ACTCTGACTACCTCCCAGTA            | TATATCAGAATCTGCTTGCAATCCAAAA    |
| HOXA10  | NM_018951    | GAGCTCACAGCCAACTTTAATTTTTCTGTA  | CCAGGGCTATAGGGCCAG              |
| HOXA3   | NM_030661    | AAGCTCACCCACCTGTGA              | AATTTGATTCTTTCTCGAGGAATCCTTAA   |
| HOXA9   | NM_152739    | GACCGAGCAAAAGACGAGTGA           | GCGGACTGGTTGTGGCAG              |
| HOXC11  | NM_014212    | TTTCTCGGGAAATCCTCTGCTGTA        | CGGCTAGCACCGGCCTAT              |
| HOXC4   | NM_014620    | AGAGGACATTACCAGGTTATA           | CCTTGCTTGTCTTCTAAGGACATTGGAAG   |
| HOXC5   | NM_018953    | TTCCAAAATGAAAAGCAAAGAGGCTCTTTA  | AATTTCACTCCCTCTACTCACTG         |
| HOXC6   | NM_004503    | AGAAGAGGAGAAGCAGAAAAGAGTG       | GAAGGCCGGGCGGGGGG               |
| HOXD1   | NM_024501    | GTCCCAAGAGCCTTCGTG              | AACAGAGCAAGACTCCGTGCAAAAAAAA    |
| HOXD10  | NM_002148    | CGCCAACCTCACGTTTTCTTA           | CCTCCAGCTTTTTCTCCCCAT           |
| HOXD11  | NM_021192    | GCAGTATTTCACTGAAACCCCTTATTTTG   | TCGATTTTCAGTTGCATGGGTTCTG       |
| HOXD3   | NM_006898    | CAAACGTACGCATCTGTA              | CCCGAGAACCAATTTATGCACTAGACT     |
| HOXD8   | NM_019558    | AGCCGAAGGCCGTGACAAATTA          | TTTTTTTTTTTTAAACAGCGCGGAATGTGT  |
| HOXD9   | NM_014213    | GAAATGCCCAAAGGAGACTG            | GAGACACATCAGAGAGATCTGTCAAGT     |
| HRAS    | NM_005343    | AAGTGTGTGCTCTCTGA               | GAGCACCACAGCCAGAC               |
| HSF1    | NM_005526    | GGACCCCACTGTCTCCTA              | CTGGGGAGTCGGGCAGGC              |
| HSF2    | NM_001135564 | GGATAGTGATATGCCACTTTTAGATAGCTA  | TCCAGTGATAATATTCTTACTACTATTTGGG |
| ID1     | NM_181353    | GAGATCCAGATCCGACCCTA            | TTAAAGACCCGAAACACTCATTAG        |
| ID2     | NM_002166    | CAAAGCACTGTGTGGCTG              | GGGGTGCTGCTGGTGGG               |
| ID3     | NM_002167    | AAAAGGAGCTTTTGCCACTGA           | CTTCTCTCCACCCCATCCC             |
| IRF2    | NM_002199    | CGCGTCAAGAGCTGTAA               | AACTGAAGCCTCACAGTAAGAACCT       |
| IRF5    | NM_001242452 | CCCAGCTGGCATGCAATA              | TGAGATACTATCTCACCTGTCAGGTTG     |



|         |              |                                |                                 |
|---------|--------------|--------------------------------|---------------------------------|
| ITFG2   | NM_018463    | CCTCCAGGATCCCACCTA             | AGTATAATTGAGAGGAATTTGAAAGCAATG  |
| JAK2    | NM_004972    | GGATCAAATAAGGGATAACATGGCTGGATG | GATTTCTGCATCCAGAACTATTAAAAATGCT |
| JARID2  | NM_004973    | CAAAAGTGCTTCGAGCTCATCATG       | ATGGAAACCATTAGGTTAGGCTGAAG      |
| JUN     | NM_002228    | ACGCAGCAGTTGCCAACATTTTGA       | TTCTAGTTTGACTCTTCTAAATTTCTTTC   |
| KL      | NM_004795    | CTCGAAGAAAGGCAGAAGAAGTTACAATA  | TGGGTCGCCCTCCCACCC              |
| KLF4    | NM_004235    | CTCGCTTACACATGAAGAGGCATTTTAA   | GTTTTTTTTTAATAAAAAAAGGTATTTTAA  |
| KLF5    | NM_001730    | TATGAAGAGGCACCAGAAGCTG         | CAGAGCGAGACTCCGTCTCAAAAAATAAAT  |
| KRT1    | NM_006121    | TCTACCCTTATTCCGGAGTAACCAGATAA  | GGTGAAATGTTGCCTGGTTGG           |
| KRT12   | NM_000223    | CAAGTTCAGGAAATTGAAGAACTAATGTAA | CTTAATCCTCAAACCCTGACATCTTCATCC  |
| LMX1A   | NM_177398    | TCCATGCAGAATTTCTACTTCACATCTTGA | TTGAAGACCCTTTTCTCCTTATGTTTTGCT  |
| LRFN1   | NM_020862    | CTGGAGAGTACCGTGTGA             | ATCTTCCATCTTCTTCAGTCTCACCTAG    |
| LRFN2   | NM_020737    | ATGGAGAGCACGGTCTAG             | TCTTGCTCAATTGGCAACAATTACCCACTAC |
| LRRN1   | NM_020873    | CGACACATCCAGAAGCTATTACATGTGGTA | CACTGCCATTAGGTGCTAGTCACT        |
| LYL1    | NM_005583    | AGCCAGAGGTCGGGTGA              | CCTCTGTCCAAGCGCCGG              |
| MAB21L1 | NM_005584    | ACCAACCCGAAAAGTTTGAAAACTTTAG   | ATGCACTGATTTTTATTTTAAAAATACTTA  |
| MAF     | NM_005360    | CGTGTACTTACCAGTGTGTTCCAAAAATGA | GTCAGATACATTGTAATAAATTATTACATG  |
| MAF1    | NM_032272    | GGTCCCAGTGATCTGTATTTG          | CTCTGCCTCCATTTTCAGCAACT         |
| MAFA    | NM_201589    | GCCGACTTCTTCTGTAG              | GCTGCTCAGTTTCTCCTGGT            |
| MAFB    | NM_005461    | TCTCCGAGTCTTTCTGTGA            | CAAGGAAGGGATTTGCTAGGGCTT        |
| MAFF    | NM_001161573 | CCCGGCTCCTGCTCCTA              | GTCTCTGTGCCATCTCCCC             |
| MAG     | NM_080600    | GGTTTCTACCCTGGAATCTCACTG       | GGCCCTGGGTTCAAGGCTAAAAT         |
| MAX     | NM_145112    | CGGATGGAGGCCAGCTAA             | GCAACTTGGCTTATGGCTGCT           |
| MDFI    | NM_005586    | GCTCTGCTTCTCCTCTG              | GGGCAGTTTCTGGGTAAGAAG           |
| MED28   | NM_025205    | ACCTCTGAAGCCAACGTG             | AAATGTTTTCCCTCCCAAAATGTAGAACAA  |
| MICB    | NM_005931    | TTCCACTGAGGGCACCTA             | GTCAGTCATTGGGAAGTAGCAGGG        |
| MLL3    | NM_170606    | CGGAAGTGGATGAAGTGA             | AACTTATTTGAAAATCTAAGAAAACCAAGT  |
| MLL4    | NM_014727    | CCGTCCGTTCTTAACTG              | CCGTAACAGACCCCATGACTGAC         |
| MLL5    | NM_182931    | CCATGGGTCAGGGTGGCATTAA         | CCACCACAGGAACAGCCC              |
| MLPH    | NM_024101    | GGTGGCCACCAGTCTCA              | GAGAAACCCTGACTTCTGTCAATCTTTAG   |
| MLX     | NM_170607    | CCAATTGAAAACCAGCTTTACTG        | GAGGCAGAAGTACTGTAAGGAGTGGAA     |
| MMP11   | NM_005940    | TGCCAACACTTCTCCTCTG            | GCAGAAGGAGCCCTGAGCA             |
| MSH3    | NM_002439    | GGAAGAAACACAGACTTCTTCTTCATTA   | GTTAATGAACAGAAAGTCCCAATGAACA    |
| MSX2    | NM_002449    | TGGCATGTACCACCTGTCTCA          | CCCCACCACCACCAATCAC             |
| MTOR    | NM_004958    | CTTAGGTGCCCTTCTGGTAA           | TGGGAACAGTCTGAGGAAAGGGA         |
| MYB     | NM_005375    | CCGGACGCTGGTCAATGTG            | TGTTCTTTCTTTTCCATTGTAATGATTCCT  |
| MYBBP1A | NM_014520    | AAGGCAGGGAAGCCCTGA             | CAGGTGGAATACTACCCACCAA          |
| MYBL2   | NM_002466    | TCGGACCCTCATCTTGTCTCTG         | AAACAGGGTCAAGGGCTCAG            |
| MYC     | NM_002467    | GCTACGGAACCTTGTGCGCTA          | GAACCTAAAGACCTTAAGGCCCCCA       |
| MYCBP   | NM_012333    | GAGGAGAAGCGTGTGAATAG           | TTTAGGCCAGCAGTTTGGGTATT         |
| MYCL1   | NM_001033082 | AAAAGAATTGCATACCTACTGGCTACTAA  | ATGCTGAAATGGCATTTCAGGAACC       |
| MYCN    | NM_005378    | AATTGAACACGCTCGGACTTGTCA       | GGGACAATGACTCATGCCCC            |
| MYF5    | NM_005593    | TAGTTCAGGCTTATCTATCATGTGCTATG  | CCTAAACTGGGTACATGAGAATGGTAAATA  |
| MYF6    | NM_002469    | GGAGGAAGTGGTGGAGAAGTA          | AGGAAAGCAAATTTCTTTCAATTGG       |
| MYOD1   | NM_002478    | CCCGATATACCAGGTGCTCTG          | TTTGCACCCCTCCTCCTTC             |
| MYOG    | NM_002479    | GATGAAACCATGCCAAGCTGA          | AAGAGCAGGGTCCCCAG               |
| MZF1    | NM_001267033 | AACGCAGCAACCTGCTGA             | ATGCTAGGAGCCACCTCTCTCA          |
| NAB2    | NM_005967    | TGAGGCCAGCCGGCAGTG             | CCAGGGTGAGAGTCTGGGTC            |
| NANOG   | NM_024865    | CATGCAACCTGAAGACGTGTG          | AGGTTCAAGCGATTCTCCTGC           |
| NCOA6   | NM_014071    | TCCAAGCGAAGAAAATCCAAGTAA       | AAGCCAAGAATGAGGTGAGGGA          |
| NCOR2   | NM_006312    | CTCTCCGACAGCGAGTGA             | TTACCAAGGGTATAAATTTCAACTTGCAA   |
| NFE2L2  | NM_001145413 | AGTAAGAAGCCAGATGTTAAGAAAACTAG  | TATTTCTCTGTAAACCCTGGTACTAGAAATG |
| NFKB1   | NM_003998    | AGGACCTCTAGAAGGCAAAATTTA       | AAACACTTCTCTTTTGATAATTTTGTTC    |
| NFXL1   | NM_152995    | TACATACCCATGATGTCAATTA         | AACATATCTACTTTTAGATACTTTTAGGT   |
| NFYC    | NM_014223    | CCAGGTGACCGGCGACTG             | AGGTACACAGCATTAAAGTTCCCTTAGCT   |
| NHLH1   | NM_005598    | CCACGTGCTGGACGTCTG             | TGTGGCCCTTTTCTCTGTCTT           |
| NHLH2   | NM_005599    | CACGCTCTGGACGTGTAG             | ATCAAAATTTCTACTACATAAATATGTTTA  |
| NKX2-1  | NM_003317    | TACGGTCCGACCTGGTGA             | CCTGGCCTCCTTACCTCCTTAA          |
| NKX2-5  | NM_004387    | GGTATCCGAGCCTGGTAG             | AACCAGTATGGTTCAGCAAGG           |
| NRF1    | NM_005011    | GGTGGTGACATTGGAACAGTG          | CTTTACGGAGGTCCCCAGC             |
| NRL     | NM_006177    | TCCCACCTCTTCTCTGA              | GCCTGCCCTCCACCCCA               |
| NRM     | NM_001270710 | CCTGGCTCACGGGCTTGA             | GGGGCGGGTCTGCGGGG               |

|         |              |                                |                                 |
|---------|--------------|--------------------------------|---------------------------------|
| NRN1L   | NM_198443    | CCTGAGGCTCTGGCCTA              | TGGGAAATGAGTGTGTTGTAAGGAGGAAGAT |
| NUAK2   | NM_030952    | TGCTCAAAGCTCACCTGA             | GAGCTACTGAGCTCACGTTTGTGTTGATTC  |
| NUP153  | NM_005124    | ATAAAGACTGCTGTTAGACGCAGGAAATAA | CAGATACTTTCAGATACTTCCCTTTCTCT   |
| OGN     | NM_014057    | AAAAGATTACCGATAGGGTCATACTTTTAA | AATTTGAGAGTTATTTGATGGTGTGTTTGT  |
| OLFM1   | NM_014279    | CCGCTCCGACGAGTTGTA             | TGGAGATCCAACAGGGACCTGT          |
| OLFM3   | NM_058170    | CATATCATCAAGACAGAGGATGACACATAG | GAATCTCTTAAATTTTCCAACCTCCAGTAG  |
| OLFM4   | NM_006418    | TGCTTTGCAGAAGCCCCAGTA          | TTATAAAAGTTATTGATGTGATCTGTTGTT  |
| ORC5    | NM_002553    | ATAATAAAATACTTGTATGATTTCTTGTA  | TGGGTAGCTAATTTAAGAAAGTGACCAGA   |
| OTX2    | NM_021728    | TGGAAATTCAGGTTTTGTGA           | TCTATTTTATGCATAGATTAGCAAAAAAAA  |
| PAX3    | NM_001127366 | TTTCATTATCTCAAGCCAGATATCGCGTAA | ATACAACTGTGGGTGTGTAACCTTATTG    |
| PBX3    | NM_006195    | TGTGCACTCGGATACCTCTAACTA       | GCAGCTGTTCCCTCCCTCC             |
| PBXIP1  | NM_020524    | CACCACCACCGGGCTGA              | GAGCAAAATGGAGCCAGGGT            |
| PITX1   | NM_002653    | TGCCAGTACAACAGCTGA             | GAATGGTGGTGGGGAAGCG             |
| PITX2   | NM_000325    | GTGGACCGGCCGCTGTGA             | GCTATCATTTATTTCTACCAAAATTTAAATA |
| POU2F3  | NM_014352    | GAATCATTCCACCTACCTCCACTG       | CTTTAGCATCAGTTTGGGGAGTAATACT    |
| PPARD   | NM_006238    | GGAGATCTACAAGGACATGTAATA       | GTCCACCTGACTGACAAGCG            |
| PTHLH   | NM_002820    | GAGCTCGATTACGGTAA              | TTCTATTTTATAAAATGGGATTAATATTTG  |
| PTMS    | NM_002824    | AAATGGGGCATCGCGTG              | ATCTTGCTTCTTGAGTCGTGGGT         |
| QSOX1   | NM_002826    | TGGCCACCCTGCAGCCTG             | CAGACAGTTCTATGGGCAGTCTGT        |
| RARA    | NM_000964    | GGCCACCCTCCCGTG                | GGCAGCTTGGAAAGGGTGC             |
| RARB    | NM_000965    | TCAGTCACTCGTGCAATA             | ATAGACTGCCGTGCATTAGCACA         |
| RARG    | NM_001042728 | CTGAAGTCCCGAGCTGA              | TGTCACCACCAATCCAG               |
| RB1     | NM_000321    | CATGGATACCTCAAACAAGGAAGAGAAATG | GAAGAAATAAATTTGGAAATCTCTAGCATA  |
| RB1CC1  | NM_014781    | AAAGCGTATCATGGAATAAGAAAGTATAA  | GAAGGGTACCAATTAAGTCAAATGGCCTA   |
| REV1    | NM_016316    | ACTTATGGAAGCACATTAAGTTACATAA   | TTCTGATATTTGGCTTAGTGCTTCTAAA    |
| RFX1    | NM_002918    | GCGCTGCCCTCCAGCTAA             | CCAGGCCGGCAACCTGGC              |
| RFX2    | NM_134433    | TCCCTGCAGGGCATCTAG             | GGGGGACAGGGCCTAGAG              |
| RFX3    | NM_002919    | GACTGTGGAGTTATTGCAAGAGTTCCTTAA | GAAGTGGAAAGATGAATATTTCAACTGAC   |
| RFX5    | NM_000449    | AAAGCAACCCCCATGA               | TAAAAACAAGCAAATTAACACATTTTT     |
| RFX6    | NM_173560    | AGCAGCTGGAGGCACTTA             | GGATATGATATGCAAATGTTTTAAATTAT   |
| RHEB    | NM_005614    | TCTTCATGCTCGGTGATGTA           | ACAGAGTGAGACCCTGTCTTTAAAAATGTA  |
| RHO     | NM_000539    | CCAGGTGGCCCCGGCCTA             | GCCTCCAAAGTGCTGGGATTA           |
| RHOA    | NM_001664    | AAATCTGGGTGCCTTGTCTTGTA        | CCAGATTAGCTGCTGGGTGG            |
| RHOB    | NM_004040    | CAACTGCTGCAAGGTGCTATG          | ATGCTCTCAAAGGGACTTCATCCTCATTTA  |
| RHOC    | NM_175744    | GGCTGTCCCATTCTCTGA             | GAGCCAGGCATGACCTCATC            |
| RHOF    | NM_019034    | CTCTGCTGCTGCTCTGA              | GGCACCTGCGTTTGCCT               |
| RHOG    | NM_001665    | TCCTGCATCCTTGTGTA              | GGGAGCCTAGAGCTTTGTTAGGGA        |
| RHOH    | NM_004310    | CTTCTCCATCAATGAGTGCAAGATCTTCTA | AAAGTGACTCTCTTGTCTCTGTTT        |
| RHOT1   | NM_001033566 | TATGTACAAAGCATTATTGAAACAGCGATG | CCAAAGTGCTGGGATTACACGATTGA      |
| RHOV    | NM_133639    | AAGAATTCTTCTGCTGTTTGA          | ATTACACTGCCCCACC                |
| RIN3    | NM_024832    | GGAGCCCAACTTCTGTG              | AGGGTGGCTGAGAGTATGCC            |
| RLF     | NM_012421    | GACAGATGAGCTTTGTGTAGGAAGTTCATA | AAAAAAAAAAAAAGAACCTTGTCTGAATG   |
| RNF152  | NM_173557    | ACTGTGATATCCTGTGGCTGA          | TCAAGATGTCCAAGAAGTGGCCA         |
| RNF43   | NM_017763    | TGTGAACAGGCTGTGTA              | TGCCAAGCCCTCTACTCTACC           |
| RNF7    | NM_014245    | GGTCCAAAGAATCGGCAAATG          | AGAAAGTACTAAAACAGTCACTGCACAA    |
| ROCK2   | NM_004850    | TAACCTTATTTTCTTTCTTTTCAGCTAA   | TAGGCCAGTAGCTACTCTTCAGTTTC      |
| RORB    | NM_006914    | TGCCACCGGCTGCAAATG             | GGAACTTTACAAGCAGGGGTTGTATGT     |
| RORC    | NM_005060    | GTGGGGCTGTCCAAGTA              | GCAGGGGTGGGTGAGGG               |
| RTCA    | NM_003729    | AGGAATTGGGATGACAAATCCAAATCTATA | AATTACACTCTATTGTAGTACAACACAT    |
| RXRB    | NM_001270401 | CCCCATCAACTGGCCTGA             | CGACAAAGCTTGCCTTGTGTC           |
| RYK     | NM_002958    | CTGGGGGCTACGTCTGA              | GGAGTCTGAGCCAGCTTAACTGT         |
| SDC1    | NM_002997    | AAACAGGAGGAATTCTATGCCTGA       | CTCTGTCTCCACGACAGGAGG           |
| SDC4    | NM_002999    | AATGAGTTCTACGCGTGA             | CTCTGCCCCACCCTCTG               |
| SETDB1  | NM_012432    | TGAATGCAGAGGACGTCTTCTTTA       | CGAGAACTCCATCTAAAAAATTCACATGC   |
| SIM2    | NM_005069    | CATCACAACGGGAGGTG              | AAAGGAATTCCTTTCCCTGGGAG         |
| SIX1    | NM_005982    | GTGGACTTGGGGTCTTAA             | GAACAGAAATAGGAAAGAGTAAGAAAGAAA  |
| SIX2    | NM_016932    | GTGGACTGGGGTCTTAG              | ACCTGAGCTGACACAAGTCG            |
| SIX6    | NM_007374    | CAGCGAGTGCGACATCTG             | GTTTAAACATATACCAGGAAGCACCAAG    |
| SMAD6   | NM_005585    | CCTCCTCAACAACCCAGATA           | AGAGTAAATGTGACTTTCCTCCCTTTTCAA  |
| SMARCE1 | NM_003079    | CCCATACCAGAAGATGAGAAAAAGAATAA  | AGTTGGGTGAGACAAGGGC             |
| SNAI1   | NM_005985    | CTCAGGATGTCCCCGCTG             | GTGACACCCAGGACTCCAAAG           |

|          |              |                                |                                 |
|----------|--------------|--------------------------------|---------------------------------|
| SNAI2    | NM_003068    | TGCTGTGTAGCACACTGA             | TTTTTGTTAAAGTGGTATGCTAACAAACCA  |
| SNAPC1   | NM_003082    | ATCCAAGAAGAGGAGAAAACTG         | AGTGGGGCCAATAATGGATCTACA        |
| SNF8     | NM_007241    | AGAGAAGCCCTCCCCTGA             | TTTTCTTCTCCAATTTAGCCACGATTGG    |
| SNX4     | NM_003794    | AATGCTAAGGAATGCTTTAGCAAGATGTAA | TGTGTACTCAATGTTTAGCTCTCACTGATA  |
| SNX6     | NM_021249    | GCAGTGTAAATGGAGACACATAA        | AGGGGCAAAGGGATGCAC              |
| SOHLH1   | NM_001012415 | GCTGGTCCCCCGCGTAA              | CTACCCAGGGCACCAGG               |
| SOLH     | NM_005632    | TGGGCCCGACCGCTGTG              | CTTGTGAGTCACCCACCAC             |
| SON      | NM_138927    | CAATTGTATGTTTTCTTGAATAGGTATTG  | GTGTGTGTGTGTGTGTGTGTGTG         |
| SOX13    | NM_005686    | GGTGGTGCTCACAGACTG             | GGATTCCCTTGCAATTAAGCCAATTCC     |
| SOX2     | NM_003106    | GCCCCCTCACACATGTG              | TTTTGCAGTTAACATTAGCACATGATGCTG  |
| SOX3     | NM_005634    | CCGCTGACCCACATCTGA             | TTAAAAGGAAACCATTTAGATTATGCTTG   |
| SOX8     | NM_014587    | CACCTGACCAGGCCCTG              | GGCTCGCGGCCGCCCTCC              |
| SOX9     | NM_000346    | CACACAGTCACTCGACCTTG           | GTCTTTTCTCAGCTTGTCTTAGGATTG     |
| SP2      | NM_003110    | CCTGGTCACGAAGAACTGTGA          | GGGCATGTGGCTTGGGTTT             |
| SP7      | NM_152860    | AGCAACTTGCTGGAGATCTGA          | CCCGCCGATAAACTATTTTACCG         |
| SP8      | NM_182700    | CGCAACGGCCTAGAGTGA             | AGCTTTGCCAAATAGATCTTCCATCTAAC   |
| SPDEF    | NM_012391    | TTCGTGCACCCCATCTGA             | CAATCAATTATCCCTTGCCCTTAGGCT     |
| SPEN     | NM_015001    | GATTGTCATTGCCTCCGTGTG          | GGACTGACTGACTAGGAGGCAGAA        |
| SPI1     | NM_003120    | CGCCACCCGCCCACTGA              | TGTGTCATTGGTCCCTCATGTTCC        |
| SREBF1   | NM_001005291 | ACTGTCACTTCCAGCTAG             | GTAACGTGTGTATTATATCTGGCCTCGTT   |
| SREBF2   | NM_004599    | TGCCATTGCCGCTCCTG              | TGGGGTAGGGGGAGGAGG              |
| SSRP1    | NM_003146    | CGCTCAGGATCCGATGAGTAG          | AATGCTCGTCCAGCCGGG              |
| SSX1     | NM_005635    | CCCTGAGGAAGATGACGAGTA          | CGCTCAGCACGAGGACA               |
| STAT1    | NM_007315    | TTTGTCTTTTACAGATGAACACAGTATAG  | TAGGGCAGGTAAGGACAACATTTAGGAAAA  |
| STAT2    | NM_005419    | TTGATGCCTTCTGACTTCTAG          | AAGGGAAGAAGAAATATGACAAGAGGAATG  |
| STAT5A   | NM_003152    | CAGAGGCTCCCTCTCATG             | AAACCACAGCAAAGCGGG              |
| STAT6    | NM_003153    | GCCAACCCAGTTGGTGA              | CCCAAGTCTTTGCAATTTCTTC          |
| STRA13   | NM_001271007 | CAGCTCTGGACTTCTAG              | CCTGGGGGTGGGGCCGAG              |
| SUV420H2 | NM_032701    | CGCGGGTGAAGAGCTGTG             | CCTAGTCCATCACGCTCCCAAT          |
| SWI5     | NM_001040011 | TGGGCTGGACATGAATGACTG          | TTATGCTAATTCCTCACAGGATGATTTAA   |
| TAF4     | NM_003185    | CTCTACAAAGCATTCTTAAGTGA        | CCTCACAGAGAAAGTTCTTTCTCCC       |
| TAGLN2   | NM_003564    | CCACGCCAGATCCTCTGA             | GAGAATGAGGATGGGGAGGAACTCA       |
| TAL2     | NM_005421    | AAGCCACCACATTCTTAA             | TGATCAAATCTCATTTTTCAAACAAACTT   |
| TBX2     | NM_005994    | CCGGGAGTCGCCAAGTG              | CGCCCTGCCCGCTGCCG               |
| TBX5     | NM_000192    | GAGTGGAGCGACAATAGCTAA          | CCCAAATTCCTCGCATGG              |
| TBX6     | NM_004608    | TCCAAACCCATGTACTGA             | ATTTTCTGAAGAGGAGATGGGCCTA       |
| TCERG1   | NM_006706    | CACGAGACGATCAACAAAATA          | TGCATTATTATATTCAAACCTTTAAAAACT  |
| TCF15    | NM_004609    | CGAGGGCCACGGAGATGA             | TGAATGGGACATCACAGGAACTG         |
| TCF19    | NM_007109    | GGCTGGCATTACAGCTA              | GCCTGGGACACAGTAGATAGACAC        |
| TCF7L2   | NM_030756    | GCTCGTACCAAGTCTTTAGAATA        | GAGTCCAAGCACAGTTCTGTATCTAA      |
| TEK      | NM_000459    | TGCTGAAGAAGCGCCTA              | AGGAGACCTTTTCAATCTGATGAGCTTC    |
| TERT     | NM_198253    | TTCAAGACCATCCTGGACTGA          | TGACCACAACCCATTCACTCATAG        |
| TFAP2A   | NM_003220    | AAAGAGGAGAAGCACAGAAAGTGA       | GGGGGGCGGGGGGGGGG               |
| TFDP1    | NM_007111    | CGAGAATGACGAGGACGACTG          | ACAACATGTGGTGGTGGGGTTT          |
| TFE3     | NM_006521    | AGCATGGAAGAGGAGTCCCTGA         | TTTGCATATTGTCTTCTCCATGCC        |
| TFEB     | NM_001167827 | GAGGGCGATGTGCTGTGA             | TGAGGCGTGTGACAAGCGT             |
| TFG      | NM_001195479 | ACCTGGACCTGGTTATCGATA          | ACCAAATGGCACTGTTTTCTCTGAAT      |
| TGFBR3L  | NM_001195259 | GCCCAGGAGGTCCCAGTG             | TGGGCATATGGGCCCGT               |
| TNFAIP3  | NM_006290    | TCAGTTCAAGCAGATGTATGGCTA       | TTATTATTTATGAAAAGCTGCCTTGCTACC  |
| TOPORS   | NM_005802    | TGTCTTGGTAGAGACTGTGATATGTCTTAA | AGGCAAAGGCAAAGTGAAGGC           |
| TP53     | NM_000546    | GGGCTGACTCAGACTGA              | CAGACTGACCCAGTCTCCAG            |
| TP53BP2  | NM_005426    | CAAAGGAGCTTGGCCTGA             | GCAAATGGGTTTGGAAACAATTCACAAA    |
| TRIM39   | NM_021253    | CCCAACAGATTGGGAGTG             | CTCTGTCTATAAAATAAATGTAGATGTCC   |
| TRIM71   | NM_001039111 | CAACAATCGAATCCTCGTCTTCTA       | AGGAAATTTCTCTGTTGCAGCATTTAAAAA  |
| TFF1     | NM_007344    | GGCCGGTGGATCATCTGA             | CAGTACCCATATAGCTGAACCTCACGTAATG |
| TFF2     | NM_003594    | CCTCAGAGTCTTTTGGCATCTA         | GAGGGCCACCTAGAAGTGACTTACAT      |
| TWIST1   | NM_000474    | ATGTCCGCTCCCACTAG              | CTTGTGCCTGTGAGTAGCTGTTTATT      |
| UBTF     | NM_014233    | TCAGACTCTGACTCCAACCTGA         | AACAATGTGAAGGTAGGTTGCTTATG      |
| USF1     | NM_207005    | GTCATCAAGAATGACAGCAACTAA       | CACACCGGTCTGGCCAG               |
| USF2     | NM_003367    | CGAGGGCACCCGGCAGTG             | CCATCCAACCAACCACTGGGTAAT        |
| USP6     | NM_004505    | TGATTACGAAAAGTACTCTATGTTACAGTA | GTAAGTGTCTGTAGCCAGGAGT          |



|         |              |                                |                                 |
|---------|--------------|--------------------------------|---------------------------------|
| VAMP2   | NM_014232    | CCTCTCTCCACAGTTTACTTCAGCACTTAA | CTCTTGCAAAGTCCAGTCCATTACCAAT    |
| VEGFA   | NM_001171627 | TGTTTTCCATTTCCCTCAGATGTG       | ACAACAAGGTGGGTCACCC             |
| VIM     | NM_003380    | AACTTCTCAGCATCACGATGACCTTGAATA | GTGAGGTCTATCAAAAATGACAAAATTAAG  |
| VIMP    | NM_203472    | TCTGGCGGATGAGGCTAA             | TCCCCTCCATTATCTCCTAATCATTCTC    |
| WT1     | NM_024424    | CTCCAGCTGGCGCTTTGA             | TGAAGTTTGACAGAGAGAAAATAAATTGTGG |
| XBP1    | NM_005080    | AGCTGGAAGCCATTAATGAACTAA       | AAAGCAGGCAGTAATTAAGGTGGAAAA     |
| XRCC3   | NM_005432    | GGGACCCAGTCCCACTGA             | AGCTACTTAACGGTTCTGGGCC          |
| XRCC4   | NM_022550    | AGAAGACCTCTTTGATGAGATTTA       | ATAAATCTTTTATCAATAATCCCTGAAAAA  |
| XRCC5   | NM_021141    | TTGTTCTTGTTACAGTTGGACATGATATA  | TCCTAGAAGCCCAAAGTAAAGCACT       |
| YBX2    | NM_015982    | ACCACCATCCTGGAGTGA             | AACCCATGATAGGGGCACTCTTC         |
| YY1     | NM_003403    | TAAGGCCAAAAACAACCAGTG          | TCAATAATCACTGTAATTGAGTGCAAAATA  |
| ZCCHC3  | NM_033089    | CGGCGTGGCCGGGCACTA             | CAACGTAGTAGGTGCTAAGTGTTC        |
| ZFP36L1 | NM_004926    | TTCAGCAGACTTTCATCTCAGATGACTAA  | GCTATAGGCTTAGCTTATAGGGATGAGAGA  |
| ZFYVE1  | NM_178441    | AATAAAAAGCCCGGTGACCTTTAA       | GTAAAAGACTGCAGTATTTGCAGGTAAAAT  |
| ZKSCAN5 | NM_014569    | TACCTTAAGTGTAGAGGGTCTCTGTTGTA  | ATTAACAGTGATGCGGGTCTTCACT       |
| ZMYND11 | NM_006624    | CTGCCGCCGAAAAGATG              | GTTTAAGTGAACAAATGATGTTTAACACAC  |
| ZNF282  | NM_003575    | GCCTCCTGAGCGAGACTA             | CACTACCCCTCCCCCA                |
| ZNF331  | NM_001079906 | ACATCAGAGGATCCACAACAGTTG       | CTCTGGGCCCTGACCCCG              |
| ZNF362  | NM_152493    | GCGAATCTCTCTCATCTG             | CTCAGTTCAGCACCTGGAGTGA          |
| ZSWIM4  | NM_023072    | GCGGGAGCGTTTGGTTG              | CTGGCAACAGAGAAAGACCAAAAAAAAAA   |

| Primer                            | Sequence                                                                       |
|-----------------------------------|--------------------------------------------------------------------------------|
| SV40 let-7c target mutagenesis F  | CTTGTTTATTGCAGCTTATAATGACATGTAACCATAACAACCTACTACCTCAGTTACAATAAAGCAATAGCATCAC   |
| SV40 let-7c target mutagenesis R  | GTGATGCTATTGCTTTATTTGTAACCTGAGGTAGTAGGTTGTATGGTTACATGTCATTATAAGCTGCAATAAACAAG  |
| SV40 miR-10b target mutagenesis F | CTTGTTTATTGCAGCTTATAATGACATGTACA AATTCGGTTCACAGGGTAGTTACAATAAAGCAATAGCATCAC    |
| SV40 miR-10b target mutagenesis R | GTGATGCTATTGCTTTATTTGTAACCTACCCTGTAGAACC GAATTTGTACATGTCATTATAAGCTGCAATAAACAAG |
| SV40 gateway F                    | GGGGACAGCTTTCTTGACAAAGTGGAACTTGTATTGTCAGCTTATAATGGT                            |
| SV40 gateway R                    | GGGGACAACCTTTGTATAATAAAGTTGGACGGTATACAGACATGATAAGATACA                         |
| pmiRint pro mut F                 | GTATCATATGCCAAGTACGCCCCCTCGAGATGGCCTCCTCCGAGAACGTC                             |
| pmiRint pro mut R                 | GACGTTCTCGGAGGAGGCCATCTCGAGGGGGCGTACTTGGCATATGATAC                             |
| CMV (SpeI)                        | ATGACTAGTAGTTCGCGTTACATAACTTACGGT                                              |
| CMV (SacI)                        | GAGCTCTGCTTATATAGACCTCCACCGTA                                                  |
| L2R3 (AsiSI) F                    | ACGTGCGATCGCACCCAGCTTTCTTGTACAAAGTTGG                                          |
| L2R3 (MluI) R                     | ACGTACGCGTGTAAAACGACGGCCAGTGAATTATC                                            |
| miR10b 400 asisi F                | ACGTGCGATCGCAAGAATATTCTGGTTGTTCCGCC                                            |
| mir10b 400 noti R                 | ACGTGCGCGCGCTCTTTCTTTCTTTTCAGCACCC                                             |
| let7c 400 asisi F                 | ACGTGCGATCGCGACATTTTACGTGACCTATGCTG                                            |
| let7c 400 noti R                  | ACTGGCGGCCGCCATTAGAAATACCATTTTGACA                                             |
| PGK BamHI F                       | CATGGATCCTGGTACCTACCGGGT                                                       |
| PGK PstI R                        | CATCTGCAGTGTCTAGAGTCGAAAGG                                                     |
| TIC mut PstI F                    | GGACGTGGTTTTCTTTGAAAAACACCTGCAGTAATCCATGGAAGACGCC                              |
| TIC mut PstI R                    | GGCGTCTTCCATGGATTACTGCAGGTGTTTTTCAAAGGAAAACACGTCC                              |
| SV40 pA For (NsiI)                | ACGTATGCATAACTTGTATTGTCAGCTTATAATGGT                                           |
| SV40 pA Rev (XmaJI)               | ACGTCCTAGGGACGGTATACAGACATGATAAGATACA                                          |
| TIC P2RP3 mut F                   | GTCCAAATTGTAAGTAGAGATCTCCGCGCGCTAGCGGGACGCGCCCTGTAGCGG                         |
| TIC P2RP3 mut R                   | CCGCTACAGGGCGCGTCCCGCTAGCGCGGGAGATCTCTAGTTACAATTTGGAC                          |
| P2R-P3 BglII F                    | CATAGATCTGTAAAACGACGGCCAGCTTAAGC                                               |
| P2R-P3 NheI R                     | CATGCTAGCCAGGAAACAGCTATGACCATG                                                 |
| MS2 BglII F                       | ACGTACAGATCTACATGAGGATCACCCATGTCT                                              |
| MS2 Apal R                        | ACGTACGGGCCACATGGGTGATCCTCATGTTT                                               |
| pLIFE ampli F                     | GGCGAAAAGTCCA AATTTGTA ACTAGAGATC                                              |
| pLIFE ampli R                     | CAGGAAACAGCTATGACCATGTAATACGACTCACTATAG                                        |

Supplementary Table 2a - 3'LIFE hits - let-7c

| Rank | Score | Refseq | Position | Alignment (top 3'UTR, bottom miRNA)                                                                                    |
|------|-------|--------|----------|------------------------------------------------------------------------------------------------------------------------|
| 1    | 0.52  | E2F5   | 1-37     | 5' GAU <u>UCCAUGGAAACUUGGGACUGUUAUCUACCUCUAA</u> 3'<br>    :            <br>3' UUGGUAUGUUGGAU-----GAUGGAGU 5'          |
| 2    | 0.58  | CREM   | 779-804  | 5' AGUAAACCACAAAAAA <u>UACCUCAGG</u> 3'<br>             <br>3' UUGGUAUGUUGGAUGAUGGAGU 5'                               |
| 3    | 0.58  | RHOB   | 922-951  | 5' CUGACCACACUUGUACGCUG <u>UAACCUCAUC</u> 3'<br>:           :        <br>3' UUGGUAUG----UUGGAUGAUGGAGU 5'              |
| 4    | 0.60  | HOXD1  | 510-535  | 5' UUUAAAAAAGCGGUUUC <u>UACCUCUCU</u> 3'<br>      :        <br>3' UUGGUAUGUUGGAUGAUGGAGU 5'                            |
| 5    | 0.60  | XBP1   | 798-836  | 5' GGAACACCUGCUGAGGGGGCUCU <u>UCCCUCAUG</u> 3'<br>       :  :  :        <br>3' UUG-GUAUG-----UUGGAUGAUGGAGU 5'         |
| 6    | 0.65  | SETDB1 | 330-351  | 5' GGAGCCUGUGUAUCUAC <u>UAUCUCCAG</u> 3'<br> :     :       :   <br>3' UUGGUAUGUUGGAUGAUGGAGU 5'                        |
| 7    | 0.65  | SREBF1 | 805-837  | 5' GGCCUCCAUGGGGUCAGUUGUCCCUUC <u>UACCUC</u> CCA 3'<br>    :   :           <br>3' UUGGUAU-----GUU-----GGAUGA-UGGAGU 5' |
| 8    | 0.66  | PBX3   | 892-923  | 5' UGUAGCUUAGAGUGCUCACUAC <u>UACCUCUGA</u> 3'<br>            :      <br>3' UUGGUAUGU-----UGGAUGAUGGAGU 5'              |
| 9    | 0.68  | ID1    | 173-199  | 5' CGUCCCUCCAACCCGCG <u>GGUCUCAU</u> 3'<br>           :   :   <br>3' UUGGUAUGUUGGAU-GAUGGAGU 5'                        |

|    |      |        |           |                                                                                                                                   |
|----|------|--------|-----------|-----------------------------------------------------------------------------------------------------------------------------------|
| 10 | 0.69 | MAF1   | 246-274   | 5' ACUGCCCUGCCCAAUGAACUGCCACAGC 3'<br>:                       <br>3' UUGGUA-UGUUGGA--UGAUGGAGU 5'                                 |
| 11 | 0.70 | BHLHB9 | 1802-1825 | 5' CUUUGCAUGUCAAAUAAAUAUGCCUCUAC 3'<br>      :       :   :          <br>3' UUGGUAU-GUUGGAUG-AUGGAGU 5'                            |
| 12 | 0.70 | NRM    | -2-25     | 5' UGAUCAGCAAGACCUCGCUACCUCCGG 3'<br>    :   :       :              <br>3' UUGGUAUGUUGGA--UGAUGGAGU 5'                            |
| 13 | 0.70 | BCCIP  | 215-247   | 5' UUUUCCUUUUCUAACCUAAUAAAAUACCUACU 3'<br>                :                      <br>3' UUGGUA-UG-UUGGAUG-----AUGGAGU 5'          |
| 14 | 0.71 | RFX6   | 450-474   | 5' AAAGUCAAAUGUGUAUGUUCUACCUCAA 3'<br>  : :       : :   :                      <br>3' UUGGUAUGU---UGGAUGAUGGAGU 5'                |
| 15 | 0.71 | MICB   | 732-757   | 5' GGUUCAAGCACUUCUCGUACCUACAGA 3'<br>    :                                  <br>3' UUGGUAUGUUGGAUGAUGGAGU 5'                      |
| 16 | 0.72 | HSF1   | 287-319   | 5' AGAAUUGUAUUUUGGAUUUUACACAACUGUCCCGUU 3'<br>    : : :       :   : :         : :     :<br>3' UUGGUAUG-----UUGGA-----UGAUGGAGU 5' |
| 17 | 0.72 | DLX4   | 165-196   | 5' CUAACCCUACAGCUAAAUCAAGGACCUCAGC 3'<br>                  :                      <br>3' UUGGUA-UGUUG-----GAUGAUGGAGU 5'          |
| 18 | 0.73 | RHOV   | 807-828   | 5' AAGGUCACACAGCCUAGAAGCUAGAG 3'<br>: : :         :                 :<br>3' UUGGUAUGUUGGAUGAUGGAGU 5'                             |

|    |      |        |           |                                                                                                                        |
|----|------|--------|-----------|------------------------------------------------------------------------------------------------------------------------|
| 19 | 0.73 | CNNM2  | 1207-1232 | 5' GAGGGCUCUGUGCCUCCUGCCUCAGA 3'<br>::   :    :     <br>3' UUGGUAUGUUGGAUGAUGGAGU 5'                                   |
| 20 | 0.73 | USF2   | 296-323   | 5' GAGGCCUGCCACGUCCCGUGCCUCUG 3'<br>:       :    :  :    <br>3' UUGGUA---UGUUGGAUGAUGGAGU 5'                           |
| 21 | 0.73 | RARB   | 1026-1060 | 5' ACUCCCAAAGAAACAGGCAUAGAAUCUGCCUCCUU 3'<br>             :    <br>3' UUGGUAUGUUGGA-----UGAUGGAGU 5'                   |
| 22 | 0.73 | OLFM4  | 714-736   | 5' AAAGUCAGUAGAAUCUUCUACCUCAUA 3'<br> :        :                 <br>3' UUGGU-AUGUUGGAUGAUGGAGU 5'                     |
| 23 | 0.73 | CRK    | 1950-1971 | 5' GCUAAUUUAUGUAUUUUACCUACACA 3'<br>  :    : :   :               <br>3' UUGGUAUGUUGGAUGAUGGAGU 5'                      |
| 24 | 0.74 | DNMT1  | 293-317   | 5' GUAGUUUUUAUAUGUUGUAAUAUUUCUU 3'<br> : : :   : :         :       <br>3' UUG---GUAUGUUGGAUGAUGGAGU 5'                 |
| 25 | 0.74 | SMAD6  | 99-127    | 5' AAAACCCCCAGAUUCAUCUACCUAGAU 3'<br>           :            :<br>3' UUGGUAUGU---UGGAUGAUGGAGU 5'                      |
| 26 | 0.75 | ETNK2  | 387-413   | 5' GGAGGCGGGGAGGGCUCCUUUCUACCUCCAG 3'<br>  :   : :   :   :               <br>3' UUGGUAUGUU-----GGAUGAUGGAGU 5'         |
| 27 | 0.75 | ARID3A | 382-414   | 5' ACAGCAGUGUGGGCCGAUCCUGUUUACCUCAUA 3'<br>  :   :  : :       : :               <br>3' UUGGUAUG-----UUGGAU-GAUGGAGU 5' |
|    |      |        |           |                                                                                                                        |

|    |      |        |           |                                                                                                                         |
|----|------|--------|-----------|-------------------------------------------------------------------------------------------------------------------------|
| 28 | 0.76 | EZH2   | 15-38     | 5' GAAAUCCCUUGACAUCUGCU <u>UACCUC</u> C 3'<br>       :  : :     <br>3' UU--GGUAUGUUGGAUGA <u>UAGGAGU</u> 5'             |
| 29 | 0.76 | STAT2  | 1192-1214 | 5' GGGUUCAAGUGACUCUCC <u>UGCCUC</u> AGC 3'<br>: :   :::      : <br>3' UUGGUAUGUUG-GAUGA <u>UAGGAGU</u> 5'               |
| 30 | 0.76 | HHAT   | 695-725   | 5' AGAGAAGUAUAACAUGGUAGU <u>UCCUCUACC</u> UACA 3'<br> : :  :         : <br>3' UUGGUAUGUUG-----GAUGA <u>UAGGAGU</u> 5'   |
| 31 | 0.76 | MYCL1  | 548-569   | 5' UGAUCAACAUGACCAU <u>UACCUC</u> ACU 3'<br>       : :    : <br>3' UUGGUAUGUUGGAUGA <u>UAGGAGU</u> 5'                   |
| 32 | 0.77 | TRIM71 | 174-204   | 5' AGAAAAGUACAACAUGCUAAGUCC <u>UACCUC</u> AUC 3'<br>   :        :            <br>3' UUGGUAUGUUG-----GAU-----GAUGGAGU 5' |
| 33 | 0.77 | SPDEF  | 36-63     | 5' GCCUCUCUCCUGCCUGCC <u>UGCCUC</u> AGC 3'<br> :     :  :    : <br>3' UUGGUAUGUUGGAU--GAUGGAGU 5'                       |
| 34 | 0.77 | EN2    | 1371-1396 | 5' ACAGUUCUGAAACAUGUGGCU <u>UACCU</u> UGUC 3'<br> :::         :        :<br>3' UUGGUAUGUUGGA---UGA <u>UAGGAGU</u> 5'    |
| 35 | 0.78 | TTF1   | 96-118    | 5' GUGGUAGUGCACACCUGU <u>AAUUUC</u> AAC 3'<br>:: : :        :  :   <br>3' UUGGUAUGU-UGGAUGA <u>UAGGAGU</u> 5'           |
| 36 | 0.79 | HES5   | 50-76     | 5' ACGACCAGAGGGCGAGCCUG <u>UCCUCUC</u> GCC 3'<br>:      :   :    :       <br>3' UUGGUAUG-----UUGGAUGAUG-GAGU 5'         |



|           |             |             |                |                                                                                                                               |
|-----------|-------------|-------------|----------------|-------------------------------------------------------------------------------------------------------------------------------|
| <b>37</b> | <b>0.80</b> | <b>RNF7</b> | <b>226-254</b> | <pre>5' UAAUUUAUUAAAGGUGGUCCUCC<u>UACCUCUGU</u> 3'       ::                 :         3' UUGGUAUGUU-----GGAUGAUGGAGU 5'</pre> |
|-----------|-------------|-------------|----------------|-------------------------------------------------------------------------------------------------------------------------------|

Supplementary Table 2b: 3'LIFE hits - miR-10b

| Rank | Score | Refseq  | Position | Alignment (top 3'UTR, bottom miRNA)                                                                                              |
|------|-------|---------|----------|----------------------------------------------------------------------------------------------------------------------------------|
| 1    | 0.44  | ZMYND11 | 524-551  | 5' GGUAUAUGAUUGAAUUUAGGGAA <b>CAGGGU</b> UGA 3'<br>: :  : :   :        <br>3' GUGUUUAAGCCAAGAU----- <b>GUCCCAU</b> 5'            |
| 2    | 0.47  | SDC1    | 734-759  | 5' GUCGCUCAUGUG-UGCAA <b>CAGGGU</b> AUG 3'<br> :     :           <br>3' GUGUUUAAGCCAAGAU <b>GUCCCAU</b> 5'                       |
| 3    | 0.57  | RARG    | 439-473  | 5' GUGCCUAAUGCUGUGUGAUGCACCUG <b>CAGGGU</b> GUG 3'<br>             :     :<br>3' GUGUUUAAGCCA-----AGAU <b>GUCCCAU</b> 5'         |
| 4    | 0.58  | LYL1    | 151-178  | 5' GGGGCAAGGUCUCGGGGGUCCG <b>GAAGGGU</b> GAU 3'<br>:   :         :      :<br>3' GUGUUUAAG-----CCAAGAU <b>GUCCCAU</b> 5'          |
| 5    | 0.64  | OLFM3   | 30-67    | 5' AGGCAAUGUGACAUGUUUCAUUGAUUUAA <b>CAGUGU</b> GAU 3'<br>:     :    :      : :<br>3' GUGUUUAAGC-----CAAGA----- <b>UGCCCAU</b> 5' |
| 6    | 0.67  | NCOR2   | 668-695  | 5' GAUGUAAAUGAUGUGUUGGUUU <b>CAGGGU</b> AUA 3'<br>::        :       <br>3' GUGUUUAAGCCA-----AGAU <b>GUCCCAU</b> 5'               |
| 7    | 0.68  | TCF15   | 249-273  | 5' AAAACAAAGACUGUUGGUGA <b>CAGGGU</b> GUG 3'<br>           :      :<br>3' GUGUUUAAGCCAA--GAU <b>GUCCCAU</b> 5'                   |
| 8    | 0.69  | MYF5    | 278-306  | 5' AUUCUGAUAGGGGGCCAUUGAU <b>UGAGGGU</b> AGC 3'<br>:   :         :      <br>3' GUGUUUAAGCCAAGAUG----- <b>UCCCAU</b> 5'           |
| 9    | 0.70  | CRK     | 78-104   | 5' AGUCUAAAUACCAU <b>UUCAGGGU</b> ACG 3'<br>: :               <br>3' GUGUUUAAGCCAAGAU <b>GUCCCAU</b> 5'                          |

|    |      |        |           |                                                                                                                   |
|----|------|--------|-----------|-------------------------------------------------------------------------------------------------------------------|
| 10 | 0.71 | USP6   | 1960-1988 | 5' AUCAAAGUAUUGGUAUUGUAUAUGGGGUGUA 3'<br>     :   :       ::   :<br>3' GUGUUUA-AGCCA-----AGAU <u>GUCCCAU</u> 5'   |
| 11 | 0.71 | DPF2   | 283-311   | 5' GGCCAGCCCCUGGUGAUCACAGGGUUCA 3'<br>    :       :      <br>3' GUGUUUAAGCAA--GAU <u>GUCCCAU</u> 5'               |
| 12 | 0.72 | TCF19  | 1350-1382 | 5' AGUAUAAAGCAUUUAAGAAUCCAGAGUAGGGUGGG 3'<br>: :         :   :<br>3' GUGUUUAAGCCAAGA-----U <u>GUCCCAU</u> 5'      |
| 13 | 0.72 | SREBF1 | 717-760   | 5' CUUAGUGGCUUUUUCCUCCUGUGUACAGGGAAGA 3'<br>:  :  :              <br>3' GUGUUUAAGCCAAG-----AU <u>GUCCCAU</u> 5'   |
| 14 | 0.73 | DLX1   | 791-817   | 5' UGAGGCUGUUUGCCAAUUCAGGGUUCU 3'<br>: :  :         <br>3' GUGUUUAAGCCAAGAU <u>GUCCCAU</u> 5'                     |
| 15 | 0.73 | ANXA7  | 94-133    | 5' ACCGAAAGAGCUUUCUGUCAAGGACCGUAUCAGGGUAA 3'<br>         :      <br>3' GUGUUUAAGCCAAGAU----- <u>GUCCCAU</u> 5'    |
| 16 | 0.75 | FXR2   | 174-205   | 5' UCCAGGAGCUAGUGGAGGGGUGUGUAACAGGGUCAU 3'<br>   : :        :      <br>3' GUGUUUAAGC-----CAAGAU <u>GUCCCAU</u> 5' |
| 17 | 0.76 | HOXD11 | 382-409   | 5' CCUCCUCUUCGGUGAAUGCAGGUUAUU 3'<br>:           :     <br>3' GUGUUUAAGCCAAG-AU <u>GUCCCAU</u> 5'                 |
| 18 | 0.77 | NCOA6  | 267-302   | 5' UUCACAUUCCUAAGCAGCCUAGAGUACAGGGUGAG 3'<br>               :<br>3' GUGUUUAAGCCAAG-----AU <u>GUCCCAU</u> 5'       |
| 19 | 0.77 | HOXD10 | 257-285   | 5' AUUAAAAAAAAUCAUCGUA AUGCAGGGUAAC 3'<br>: :         :   <br>3' GUGUUUAAGC--CAAGAU <u>GUCCCAU</u> 5'             |

|    |      |        |           |                                                                                                                            |
|----|------|--------|-----------|----------------------------------------------------------------------------------------------------------------------------|
| 20 | 0.77 | HHAT   | 252-278   | 5' GUGUCUUACCCAGCUACA <b>CAGGGU</b> GAC 3'<br>               :<br>3' GUGUUUAAGCCAAGAU <b>GUCCCAU</b> 5'                    |
| 21 | 0.77 | NUAK2  | 701-737   | 5' CCGGCUAAUUUUUGUAUUUUUAGUAGAGA <b>CAGGGU</b> UUC 3'<br>:      :    :       <br>3' GUGUUUAAGCCAAGA----- <b>UGCCCAU</b> 5' |
| 22 | 0.78 | HOXD1  | 442-468   | 5' UUUUGAGAUGACCAAAGCUAGU <b>UAGGGU</b> CUC 3'<br>:  :         :    <br>3' GUGUUUA--AGCCAAGAU-- <b>GUCCCAU</b> 5'          |
| 23 | 0.78 | STAT6  | 920-955   | 5' UCCACACCUCCAAUGCUGCCUGGGAGC <b>CAGGGU</b> GAG 3'<br>             :      :<br>3' GUGUUUAAGCCAAGAU----- <b>GUCCCAU</b> 5' |
| 24 | 0.78 | ASCL2  | 1112-1138 | 5' GACACGAG--CAGUCCCUGAGGGG <b>CGGGGU</b> CCC 3'<br>   : :        : :    <br>3' GUGUUUAAGCCAAGA----- <b>UGCCCAU</b> 5'     |
| 25 | 0.79 | HIVEP2 | 1267-1289 | 5' AGCCGGUUUACAUGGGAAC <b>CAGGGU</b> UAA 3'<br>  :          <br>3' GUGUUUAAGCCAAGAU <b>GUCCCAU</b> 5'                      |
| 26 | 0.79 | GATA3  | 240-262   | 5' CUCAUAUCCCCUAUUUAA <b>CAGGGU</b> CUC 3'<br>  :      :      <br>3' GUGUUUAAGCCAAGAU <b>GUCCCAU</b> 5'                    |

**Supplementary table 3 - Literature review**

The following references were used to define genes detected by 3'LIFE as either having a positive or a negative role in tumorigenesis.

***let-7c* Targets:**

| <b>Gene</b>   | <b>References:</b>                                                                                                                                |
|---------------|---------------------------------------------------------------------------------------------------------------------------------------------------|
| <b>E2F5</b>   | (Umemura, Shirane et al. 2009; Zhao, Wu et al. 2013)                                                                                              |
| <b>CREM</b>   | (Passon, Puppin et al. 2012; Healey, Crow et al. 2013)                                                                                            |
| <b>RHOB</b>   | (Marlow, D'Innocenzi et al. 2010; Zhou, Zhu et al. 2011; Kazerounian, Gerald et al. 2013; Medale-Giamarchi, Lajoie-Mazenc et al. 2013)            |
| <b>HOXD1</b>  | (Faryna, Konermann et al. 2012; Pussila, Sarantaus et al. 2013)                                                                                   |
| <b>XBP1</b>   | (Doane, Danso et al. 2006; Sengupta, Sharma et al. 2010)                                                                                          |
| <b>SETDB1</b> | (Rodriguez-Paredes, Martinez de Paz et al. 2013; Noh, Kim et al. 2014)                                                                            |
| <b>SREBF1</b> | (Furuta, Pai et al. 2008; Pandey, Xing et al. 2013)                                                                                               |
| <b>PBX3</b>   | (Ramberg, Alshbib et al. 2011; Han, Gu et al. 2012)                                                                                               |
| <b>ID1</b>    | (Kalas, Yu et al. 2005; Swarbrick, Roy et al. 2008; Pillai, Rizwani et al. 2011)                                                                  |
| <b>MAF1</b>   |                                                                                                                                                   |
| <b>BHLHB9</b> |                                                                                                                                                   |
| <b>NRM</b>    | (Chen, Chen et al. 2012)                                                                                                                          |
| <b>BCCIP</b>  | (Liu, Yuan et al. 2001; Meng, Liu et al. 2003; Lu, Yue et al. 2007)                                                                               |
| <b>RFX6</b>   | (Takata, Akamatsu et al. 2010; Huang, Whittington et al. 2014)                                                                                    |
| <b>MICB</b>   | (Groh, Wu et al. 2002; Holdenrieder, Stieber et al. 2006; Kohga, Takehara et al. 2008)                                                            |
| <b>HSF1</b>   | (Stanhill, Levin et al. 2006; Dai, Whitesell et al. 2007; Dai, Santagata et al. 2012; Xi, Hu et al. 2012)                                         |
| <b>DLX4</b>   | (Tomida, Yanagisawa et al. 2007; Zhang, Yang et al. 2012; Trinh, Ko et al. 2013)                                                                  |
| <b>RHOV</b>   | (Cavalli, Man et al. 2008; Peng, Zhou et al. 2011; Shepelev and Korobko 2013)                                                                     |
| <b>CNNM2</b>  |                                                                                                                                                   |
| <b>USF2</b>   | (Ismail, Lu et al. 1999; Pawar, Szentirmay et al. 2004)                                                                                           |
| <b>RARB</b>   | (Farias, Arapshian et al. 2002; Liu, Nugoli et al. 2011)                                                                                          |
| <b>OLFM4</b>  | (Koshida, Kobayashi et al. 2007; Huang, Wang et al. 2012; Li, Rodriguez-Canales et al. 2013)                                                      |
| <b>CRK</b>    | (Tsuda and Tanaka 2012; Kumar, Fajardo et al. 2014)                                                                                               |
| <b>DNMT1</b>  | (Gazin, Wajapeyee et al. 2007; Huang, Stewart et al. 2013; Wajapeyee, Malonia et al. 2013)                                                        |
| <b>SMAD6</b>  | (Kleeff, Maruyama et al. 1999; Jeon, Dracheva et al. 2008)                                                                                        |
| <b>ETNK2</b>  |                                                                                                                                                   |
| <b>ARID3A</b> | (Peeper, Shvarts et al. 2002; Ma, Araki et al. 2003)                                                                                              |
| <b>EZH2</b>   | (Chase and Cross 2011; Deb, Thakur et al. 2013)                                                                                                   |
| <b>STAT2</b>  | (Yu and Jove 2004)                                                                                                                                |
| <b>HHAT</b>   | (Konitsiotis, Chang et al. 2014; Petrova, Matevossian et al. 2014)                                                                                |
| <b>MYCL1</b>  | (Kim, Girard et al. 2006; Xiong, Wu et al. 2011; Rudin, Durinck et al. 2012)                                                                      |
| <b>TRIM71</b> | (Chen, Yuan et al. 2013)                                                                                                                          |
| <b>SPDEF</b>  | (Steffan, Koul et al. 2012; Buchwalter, Hickey et al. 2013; Fletcher, Castro et al. 2013; Mukhopadhyay, Khoury et al. 2013; Noah, Lo et al. 2013) |
| <b>EN2</b>    | (Martin, Saba-EI-Leil et al. 2005; Bose, Bullard et al. 2008)                                                                                     |
| <b>TTF1</b>   | (Lessard, Morin et al. 2010)                                                                                                                      |

|             |                                                                                                                      |
|-------------|----------------------------------------------------------------------------------------------------------------------|
| <b>HES5</b> | (Osipo, Patel et al. 2008; Mittal, Subramanyam et al. 2009; Aste-Amezaga, Zhang et al. 2010)<br>also RAS implication |
| <b>RNF7</b> | (Tan, Li et al. 2011; Lazar, Suo et al. 2013; Yang, Huh et al. 2013)                                                 |

### ***miR-10b Targets:***

|                |                                                                                                                                          |
|----------------|------------------------------------------------------------------------------------------------------------------------------------------|
| <b>ZMYND11</b> | (Wen, Li et al. 2014)                                                                                                                    |
| <b>SDC1</b>    | (Yang, MacLeod et al. 2007; Ishikawa and Kramer 2010; Nguyen, Grizzle et al. 2013)                                                       |
| <b>RARG</b>    | (Chen, Goyette et al. 2004; Goranov, Campbell Hewson et al. 2006; Zhao, Graves et al. 2009; Yan, Wu et al. 2010; Huang, Luo et al. 2013) |
| <b>LYL1</b>    | (Nagel, Venturini et al. 2010; McCormack, Shields et al. 2013)                                                                           |
| <b>OLFM3</b>   |                                                                                                                                          |
| <b>NCOR2</b>   | (Cheng and Kao 2009; van Agthoven, Sieuwerts et al. 2009; Varlakhanova, Hahm et al. 2011)                                                |
| <b>TCF15</b>   |                                                                                                                                          |
| <b>MYF5</b>    |                                                                                                                                          |
| <b>CRK</b>     | (Tsuda and Tanaka 2012; Kumar, Fajardo et al. 2014)                                                                                      |
| <b>USP6</b>    | (Pringle, Young et al. 2012; Rueckert and Haucke 2012)                                                                                   |
| <b>DPF2</b>    |                                                                                                                                          |
| <b>TCF19</b>   |                                                                                                                                          |
| <b>SREBF1</b>  | (Furuta, Pai et al. 2008; Pandey, Xing et al. 2013)                                                                                      |
| <b>DLX1</b>    |                                                                                                                                          |
| <b>ANXA7</b>   | (Srivastava, Torosyan et al. 2007; Torosyan, Dobi et al. 2010; Jin, Wang et al. 2013)                                                    |
| <b>FXR2</b>    |                                                                                                                                          |
| <b>HOXD11</b>  | (Shiraishi, Sekiguchi et al. 2002; Miyamoto, Fukutomi et al. 2005)                                                                       |
| <b>NCOA6</b>   | (Lee, Lee et al. 2006)                                                                                                                   |
| <b>HOXD10</b>  | (Ma, Teruya-Feldstein et al. 2007; Ma, Reinhardt et al. 2010; Sekar, Bharti et al. 2014)                                                 |
| <b>HHAT</b>    | (Konitsiotis, Chang et al. 2014; Petrova, Matevossian et al. 2014)                                                                       |
| <b>NUAK2</b>   | (Suzuki, Kusakai et al. 2003; Tsuchihara, Ogura et al. 2008)                                                                             |
| <b>HOXD1</b>   | (Faryna, Konermann et al. 2012; Pussila, Sarantaus et al. 2013)                                                                          |
| <b>STAT6</b>   | (Gooch, Christy et al. 2002; Wei, He et al. 2014)                                                                                        |
| <b>ASCL2</b>   | (de Sousa, Colak et al. 2011; Reed, Tunster et al. 2012; Zhu, Yang et al. 2012)                                                          |
| <b>HIVEP2</b>  | (Fujii, Gabrielson et al. 2005; Yin, Wang et al. 2010)                                                                                   |
| <b>GATA3</b>   | (Chou, Lin et al. 2013; Chu, Lai et al. 2013; Li, Ishiguro et al. 2014)                                                                  |



**References:**

1. Aste-Amezaga, M., N. Zhang, et al. (2010). "Characterization of Notch1 antibodies that inhibit signaling of both normal and mutated Notch1 receptors." *Plos One* **5**(2): e9094.
2. Bose, S. K., R. S. Bullard, et al. (2008). "Oncogenic role of engrailed-2 (en-2) in prostate cancer cell growth and survival." *Transl Oncogenomics* **3**: 37-43.
3. Buchwalter, G., M. M. Hickey, et al. (2013). "PDEF promotes luminal differentiation and acts as a survival factor for ER-positive breast cancer cells." *Cancer Cell* **23**(6): 753-767.
4. Cavalli, L. R., Y. G. Man, et al. (2008). "Amplification of the BP1 homeobox gene in breast cancer." *Cancer Genet Cytogenet* **187**(1): 19-24.
5. Chase, A. and N. C. Cross (2011). "Aberrations of EZH2 in cancer." *Clin Cancer Res* **17**(9): 2613-2618.
6. Chen, C. F., P. Goyette, et al. (2004). "RARgamma acts as a tumor suppressor in mouse keratinocytes." *Oncogene* **23**(31): 5350-5359.
7. Chen, H., K. Chen, et al. (2012). "The integral nuclear membrane protein nurim plays a role in the suppression of apoptosis." *Curr Mol Med* **12**(10): 1372-1382.
8. Chen, Y. L., R. H. Yuan, et al. (2013). "The stem cell E3-ligase Lin-41 promotes liver cancer progression through inhibition of microRNA-mediated gene silencing." *J Pathol* **229**(3): 486-496.
9. Cheng, X. and H. Y. Kao (2009). "G protein pathway suppressor 2 (GPS2) is a transcriptional corepressor important for estrogen receptor alpha-mediated transcriptional regulation." *J Biol Chem* **284**(52): 36395-36404.
10. Chou, J., J. H. Lin, et al. (2013). "GATA3 suppresses metastasis and modulates the tumour microenvironment by regulating microRNA-29b expression." *Nat Cell Biol* **15**(2): 201-213.
11. Chu, I. M., W. C. Lai, et al. (2013). "Expression of GATA3 in MDA-MB-231 triple-negative breast cancer cells induces a growth inhibitory response to TGFss." *Plos One* **8**(4): e61125.
12. Dai, C., S. Santagata, et al. (2012). "Loss of tumor suppressor NF1 activates HSF1 to promote carcinogenesis." *J Clin Invest* **122**(10): 3742-3754.
13. Dai, C., L. Whitesell, et al. (2007). "Heat shock factor 1 is a powerful multifaceted modifier of carcinogenesis." *Cell* **130**(6): 1005-1018.
14. de Sousa, E. M. F., S. Colak, et al. (2011). "Methylation of cancer-stem-cell-associated Wnt target genes predicts poor prognosis in colorectal cancer patients." *Cell Stem Cell* **9**(5): 476-485.
15. Deb, G., V. S. Thakur, et al. (2013). "Multifaceted role of EZH2 in breast and prostate tumorigenesis: epigenetics and beyond." *Epigenetics* **8**(5): 464-476.
16. Doane, A. S., M. Danso, et al. (2006). "An estrogen receptor-negative breast cancer subset characterized by a hormonally regulated transcriptional program and response to androgen." *Oncogene* **25**(28): 3994-4008.
17. Farias, E. F., A. Arapshian, et al. (2002). "Retinoic acid receptor alpha2 is a growth suppressor epigenetically silenced in MCF-7 human breast cancer cells." *Cell Growth Differ* **13**(8): 335-341.
18. Faryna, M., C. Konermann, et al. (2012). "Genome-wide methylation screen in low-grade breast cancer identifies novel epigenetically altered genes as potential biomarkers for tumor diagnosis." *FASEB J* **26**(12): 4937-4950.

19. Fletcher, M. N., M. A. Castro, et al. (2013). "Master regulators of FGFR2 signalling and breast cancer risk." *Nat Commun* **4**: 2464.
20. Fujii, H., E. Gabrielson, et al. (2005). "Frequent down-regulation of HIVEP2 in human breast cancer." *Breast Cancer Res Treat* **91**(2): 103-112.
21. Furuta, E., S. K. Pai, et al. (2008). "Fatty acid synthase gene is up-regulated by hypoxia via activation of Akt and sterol regulatory element binding protein-1." *Cancer Res* **68**(4): 1003-1011.
22. Gazin, C., N. Wajapeyee, et al. (2007). "An elaborate pathway required for Ras-mediated epigenetic silencing." *Nature* **449**(7165): 1073-1077.
23. Gooch, J. L., B. Christy, et al. (2002). "STAT6 mediates interleukin-4 growth inhibition in human breast cancer cells." *Neoplasia* **4**(4): 324-331.
24. Goranov, B. B., Q. D. Campbell Hewson, et al. (2006). "Overexpression of RARgamma increases death of SH-SY5Y neuroblastoma cells in response to retinoic acid but not fenretinide." *Cell Death Differ* **13**(4): 676-679.
25. Groh, V., J. Wu, et al. (2002). "Tumour-derived soluble MIC ligands impair expression of NKG2D and T-cell activation." *Nature* **419**(6908): 734-738.
26. Han, H. B., J. Gu, et al. (2012). "Let-7c functions as a metastasis suppressor by targeting MMP11 and PBX3 in colorectal cancer." *J Pathol* **226**(3): 544-555.
27. Healey, M., M. S. Crow, et al. (2013). "Ras-induced melanoma transformation is associated with the proteasomal degradation of the transcriptional repressor ICER." *Mol Carcinog* **52**(9): 692-704.
28. Holdenrieder, S., P. Stieber, et al. (2006). "Soluble MICB in malignant diseases: analysis of diagnostic significance and correlation with soluble MICA." *Cancer Immunol Immunother* **55**(12): 1584-1589.
29. Huang, G. L., Q. Luo, et al. (2013). "Oncogenic activity of retinoic acid receptor gamma is exhibited through activation of the Akt/NF-kappaB and Wnt/beta-catenin pathways in cholangiocarcinoma." *Mol Cell Biol* **33**(17): 3416-3425.
30. Huang, J., A. Stewart, et al. (2013). "RGS6 suppresses Ras-induced cellular transformation by facilitating Tip60-mediated Dnmt1 degradation and promoting apoptosis." *Oncogene*.
31. Huang, M. Y., H. M. Wang, et al. (2012). "EVI2B, ATP2A2, S100B, TM4SF3, and OLFM4 as potential prognostic markers for postoperative Taiwanese colorectal cancer patients." *DNA Cell Biol* **31**(4): 625-635.
32. Huang, Q., T. Whittington, et al. (2014). "A prostate cancer susceptibility allele at 6q22 increases RFX6 expression by modulating HOXB13 chromatin binding." *Nature Genetics* **46**(2): 126-135.
33. Ishikawa, T. and R. H. Kramer (2010). "Sdc1 negatively modulates carcinoma cell motility and invasion." *Exp Cell Res* **316**(6): 951-965.
34. Ismail, P. M., T. Lu, et al. (1999). "Loss of USF transcriptional activity in breast cancer cell lines." *Oncogene* **18**(40): 5582-5591.
35. Jeon, H. S., T. Dracheva, et al. (2008). "SMAD6 contributes to patient survival in non-small cell lung cancer and its knockdown reestablishes TGF-beta homeostasis in lung cancer cells." *Cancer Res* **68**(23): 9686-9692.
36. Jin, Y., S. Wang, et al. (2013). "Annexin A7 suppresses lymph node metastasis of hepatocarcinoma cells in a mouse model." *BMC Cancer* **13**: 522.
37. Kalas, W., J. L. Yu, et al. (2005). "Oncogenes and Angiogenesis: down-regulation of thrombospondin-1 in normal fibroblasts exposed to factors from cancer cells harboring mutant ras." *Cancer Res* **65**(19): 8878-8886.

38. Kazerounian, S., D. Gerald, et al. (2013). "RhoB differentially controls Akt function in tumor cells and stromal endothelial cells during breast tumorigenesis." Cancer Res **73**(1): 50-61.
39. Kim, Y. H., L. Girard, et al. (2006). "Combined microarray analysis of small cell lung cancer reveals altered apoptotic balance and distinct expression signatures of MYC family gene amplification." Oncogene **25**(1): 130-138.
40. Kleeff, J., H. Maruyama, et al. (1999). "Smad6 suppresses TGF-beta-induced growth inhibition in COLO-357 pancreatic cancer cells and is overexpressed in pancreatic cancer." Biochem Biophys Res Commun **255**(2): 268-273.
41. Kohga, K., T. Takehara, et al. (2008). "Serum levels of soluble major histocompatibility complex (MHC) class I-related chain A in patients with chronic liver diseases and changes during transcatheter arterial embolization for hepatocellular carcinoma." Cancer Sci **99**(8): 1643-1649.
42. Konitsiotis, A. D., S. C. Chang, et al. (2014). "Attenuation of hedgehog acyltransferase-catalyzed sonic hedgehog palmitoylation causes reduced signaling, proliferation and invasiveness of human carcinoma cells." Plos One **9**(3): e89899.
43. Koshida, S., D. Kobayashi, et al. (2007). "Specific overexpression of OLFM4(GW112/HGC-1) mRNA in colon, breast and lung cancer tissues detected using quantitative analysis." Cancer Sci **98**(3): 315-320.
44. Kumar, S., J. E. Fajardo, et al. (2014). "Crk at the quarter century mark: perspectives in signaling and cancer." J Cell Biochem **115**(5): 819-825.
45. Lazar, V., C. Suo, et al. (2013). "Integrated molecular portrait of non-small cell lung cancers." BMC Med Genomics **6**: 53.
46. Lee, S., D. K. Lee, et al. (2006). "Coactivator as a target gene specificity determinant for histone H3 lysine 4 methyltransferases." Proc Natl Acad Sci U S A **103**(42): 15392-15397.
47. Lessard, F., F. Morin, et al. (2010). "The ARF tumor suppressor controls ribosome biogenesis by regulating the RNA polymerase I transcription factor TTF-I." Molecular Cell **38**(4): 539-550.
48. Li, H., J. Rodriguez-Canales, et al. (2013). "Deletion of the olfactomedin 4 gene is associated with progression of human prostate cancer." Am J Pathol **183**(4): 1329-1338.
49. Li, Y., H. Ishiguro, et al. (2014). "Loss of GATA3 in bladder cancer promotes cell migration and invasion." Cancer Biol Ther **15**(4): 428-435.
50. Liu, J., Y. Yuan, et al. (2001). "Inhibition of breast and brain cancer cell growth by BCCIPalpha, an evolutionarily conserved nuclear protein that interacts with BRCA2." Oncogene **20**(3): 336-345.
51. Liu, X., M. Nugoli, et al. (2011). "Stromal retinoic acid receptor beta promotes mammary gland tumorigenesis." Proc Natl Acad Sci U S A **108**(2): 774-779.
52. Lu, H., J. Yue, et al. (2007). "BCCIP regulates homologous recombination by distinct domains and suppresses spontaneous DNA damage." Nucleic Acids Res **35**(21): 7160-7170.
53. Ma, K., K. Araki, et al. (2003). "E2FBP1/DRIL1, an AT-rich interaction domain-family transcription factor, is regulated by p53." Mol Cancer Res **1**(6): 438-444.
54. Ma, L., F. Reinhardt, et al. (2010). "Therapeutic silencing of miR-10b inhibits metastasis in a mouse mammary tumor model." Nat Biotechnol **28**(4): 341-347.
55. Ma, L., J. Teruya-Feldstein, et al. (2007). "Tumour invasion and metastasis initiated by microRNA-10b in breast cancer." Nature **449**(7163): 682-688.

56. Marlow, L. A., J. D'Innocenzi, et al. (2010). "Detailed molecular fingerprinting of four new anaplastic thyroid carcinoma cell lines and their use for verification of RhoB as a molecular therapeutic target." *J Clin Endocrinol Metab* **95**(12): 5338-5347.
57. Martin, N. L., M. K. Saba-El-Leil, et al. (2005). "EN2 is a candidate oncogene in human breast cancer." *Oncogene* **24**(46): 6890-6901.
58. McCormack, M. P., B. J. Shields, et al. (2013). "Requirement for Lyl1 in a model of Lmo2-driven early T-cell precursor ALL." *Blood* **122**(12): 2093-2103.
59. Medale-Giamarchi, C., I. Lajoie-Mazenc, et al. (2013). "RhoB modifies estrogen responses in breast cancer cells by influencing expression of the estrogen receptor." *Breast Cancer Res* **15**(1): R6.
60. Meng, X., J. Liu, et al. (2003). "Genomic structure of the human BCCIP gene and its expression in cancer." *Gene* **302**(1-2): 139-146.
61. Mittal, S., D. Subramanyam, et al. (2009). "Cooperation of Notch and Ras/MAPK signaling pathways in human breast carcinogenesis." *Mol Cancer* **8**: 128.
62. Miyamoto, K., T. Fukutomi, et al. (2005). "Identification of 20 genes aberrantly methylated in human breast cancers." *Int J Cancer* **116**(3): 407-414.
63. Mukhopadhyay, A., T. Khoury, et al. (2013). "Prostate derived Ets transcription factor and Carcinoembryonic antigen related cell adhesion molecule 6 constitute a highly active oncogenic axis in breast cancer." *Oncotarget* **4**(4): 610-621.
64. Nagel, S., L. Venturini, et al. (2010). "Multiple mechanisms induce ectopic expression of LYL1 in subsets of T-ALL cell lines." *Leuk Res* **34**(4): 521-528.
65. Nguyen, T. L., W. E. Grizzle, et al. (2013). "Syndecan-1 overexpression is associated with nonluminal subtypes and poor prognosis in advanced breast cancer." *Am J Clin Pathol* **140**(4): 468-474.
66. Noah, T. K., Y. H. Lo, et al. (2013). "SPDEF functions as a colorectal tumor suppressor by inhibiting beta-catenin activity." *Gastroenterology* **144**(5): 1012-1023 e1016.
67. Noh, H. J., K. A. Kim, et al. (2014). "p53 Down-regulates SETDB1 gene expression during paclitaxel induced-cell death." *Biochem Biophys Res Commun*.
68. Osipo, C., P. Patel, et al. (2008). "ErbB-2 inhibition activates Notch-1 and sensitizes breast cancer cells to a gamma-secretase inhibitor." *Oncogene* **27**(37): 5019-5032.
69. Pandey, P. R., F. Xing, et al. (2013). "Elevated lipogenesis in epithelial stem-like cell confers survival advantage in ductal carcinoma in situ of breast cancer." *Oncogene* **32**(42): 5111-5122.
70. Passon, N., C. Puppin, et al. (2012). "Cyclic AMP-response element modulator inhibits the promoter activity of the sodium iodide symporter gene in thyroid cancer cells." *Thyroid* **22**(5): 487-493.
71. Pawar, S. A., M. N. Szentirmay, et al. (2004). "Evidence for a cancer-specific switch at the CDK4 promoter with loss of control by both USF and c-Myc." *Oncogene* **23**(36): 6125-6135.
72. Peeper, D. S., A. Shvarts, et al. (2002). "A functional screen identifies hDRIL1 as an oncogene that rescues RAS-induced senescence." *Nat Cell Biol* **4**(2): 148-153.
73. Peng, Y. B., J. Zhou, et al. (2011). "Normal prostate-derived stromal cells stimulate prostate cancer development." *Cancer Sci* **102**(9): 1630-1635.
74. Petrova, E., A. Matevossian, et al. (2014). "Hedgehog acyltransferase as a target in pancreatic ductal adenocarcinoma." *Oncogene*.
75. Pillai, S., W. Rizwani, et al. (2011). "ID1 facilitates the growth and metastasis of non-small cell lung cancer in response to nicotinic acetylcholine receptor and epidermal growth factor receptor signaling." *Mol Cell Biol* **31**(14): 3052-3067.

76. Pringle, L. M., R. Young, et al. (2012). "Atypical mechanism of NF-kappaB activation by TRE17/ubiquitin-specific protease 6 (USP6) oncogene and its requirement in tumorigenesis." *Oncogene* **31**(30): 3525-3535.
77. Pussila, M., L. Sarantaus, et al. (2013). "Cancer-predicting gene expression changes in colonic mucosa of Western diet fed Mlh1+/- mice." *Plos One* **8**(10): e76865.
78. Ramberg, H., A. Alshbib, et al. (2011). "Regulation of PBX3 expression by androgen and Let-7d in prostate cancer." *Mol Cancer* **10**: 50.
79. Reed, K. R., S. J. Tunster, et al. (2012). "Entopic overexpression of Ascl2 does not accelerate tumourigenesis in ApcMin mice." *Gut* **61**(10): 1435-1438.
80. Rodriguez-Paredes, M., A. Martinez de Paz, et al. (2013). "Gene amplification of the histone methyltransferase SETDB1 contributes to human lung tumorigenesis." *Oncogene*.
81. Rudin, C. M., S. Durinck, et al. (2012). "Comprehensive genomic analysis identifies SOX2 as a frequently amplified gene in small-cell lung cancer." *Nature Genetics* **44**(10): 1111-1116.
82. Rueckert, C. and V. Haucke (2012). "The oncogenic TBC domain protein USP6/TRE17 regulates cell migration and cytokinesis." *Biol Cell* **104**(1): 22-33.
83. Sekar, P., J. N. Bharti, et al. (2014). "Evaluation of p53, HoxD10, and E-Cadherin Status in Breast Cancer and Correlation with Histological Grade and Other Prognostic Factors." *J Oncol* **2014**: 702527.
84. Sengupta, S., C. G. Sharma, et al. (2010). "Estrogen regulation of X-box binding protein-1 and its role in estrogen induced growth of breast and endometrial cancer cells." *Horm Mol Biol Clin Investig* **2**(2): 235-243.
85. Shepelev, M. V. and I. V. Korobko (2013). "The RHOV gene is overexpressed in human non-small cell lung cancer." *Cancer Genet* **206**(11): 393-397.
86. Shiraishi, M., A. Sekiguchi, et al. (2002). "HOX gene clusters are hotspots of de novo methylation in CpG islands of human lung adenocarcinomas." *Oncogene* **21**(22): 3659-3662.
87. Srivastava, M., Y. Torosyan, et al. (2007). "ANXA7 expression represents hormone-relevant tumor suppression in different cancers." *Int J Cancer* **121**(12): 2628-2636.
88. Stanhill, A., V. Levin, et al. (2006). "Ha-ras(val12) induces HSP70b transcription via the HSE/HSF1 system, but HSP70b expression is suppressed in Ha-ras(val12)-transformed cells." *Oncogene* **25**(10): 1485-1495.
89. Steffan, J. J., S. Koul, et al. (2012). "The transcription factor SPDEF suppresses prostate tumor metastasis." *J Biol Chem* **287**(35): 29968-29978.
90. Suzuki, A., G. Kusakai, et al. (2003). "Induction of cell-cell detachment during glucose starvation through F-actin conversion by SNARK, the fourth member of the AMP-activated protein kinase catalytic subunit family." *Biochem Biophys Res Commun* **311**(1): 156-161.
91. Swarbrick, A., E. Roy, et al. (2008). "Id1 cooperates with oncogenic Ras to induce metastatic mammary carcinoma by subversion of the cellular senescence response." *Proc Natl Acad Sci U S A* **105**(14): 5402-5407.
92. Takata, R., S. Akamatsu, et al. (2010). "Genome-wide association study identifies five new susceptibility loci for prostate cancer in the Japanese population." *Nature Genetics* **42**(9): 751-754.
93. Tan, M., Y. Li, et al. (2011). "Inactivation of SAG E3 ubiquitin ligase blocks embryonic stem cell differentiation and sensitizes leukemia cells to retinoid acid." *Plos One* **6**(11): e27726.

94. Tomida, S., K. Yanagisawa, et al. (2007). "Identification of a metastasis signature and the DLX4 homeobox protein as a regulator of metastasis by combined transcriptome approach." *Oncogene* **26**(31): 4600-4608.
95. Torosyan, Y., A. Dobi, et al. (2010). "Role of multi-hnRNP nuclear complex in regulation of tumor suppressor ANXA7 in prostate cancer cells." *Oncogene* **29**(17): 2457-2466.
96. Trinh, B. Q., S. Y. Ko, et al. (2013). "Dual functions of the homeoprotein DLX4 in modulating responsiveness of tumor cells to topoisomerase II-targeting drugs." *Cancer Res* **73**(2): 1000-1010.
97. Tsuchihara, K., T. Ogura, et al. (2008). "Susceptibility of Snark-deficient mice to azoxymethane-induced colorectal tumorigenesis and the formation of aberrant crypt foci." *Cancer Sci* **99**(4): 677-682.
98. Tsuda, M. and S. Tanaka (2012). "Roles for crk in cancer metastasis and invasion." *Genes Cancer* **3**(5-6): 334-340.
99. Umemura, S., M. Shirane, et al. (2009). "Overexpression of E2F-5 correlates with a pathological basal phenotype and a worse clinical outcome." *Br J Cancer* **100**(5): 764-771.
100. van Agthoven, T., A. M. Sieuwerts, et al. (2009). "CITED2 and NCOR2 in anti-oestrogen resistance and progression of breast cancer." *Br J Cancer* **101**(11): 1824-1832.
101. Varlakhanova, N., J. B. Hahm, et al. (2011). "Regulation of SMRT corepressor dimerization and composition by MAP kinase phosphorylation." *Mol Cell Endocrinol* **332**(1-2): 180-188.
102. Wajapeyee, N., S. K. Malonia, et al. (2013). "Oncogenic RAS directs silencing of tumor suppressor genes through ordered recruitment of transcriptional repressors." *Genes Dev* **27**(20): 2221-2226.
103. Wei, M., Q. He, et al. (2014). "Integrity of the LXXLL motif in Stat6 is required for the inhibition of breast cancer cell growth and enhancement of differentiation in the context of progesterone." *BMC Cancer* **14**(1): 10.
104. Wen, H., Y. Li, et al. (2014). "ZMYND11 links histone H3.3K36me3 to transcription elongation and tumour suppression." *Nature*.
105. Xi, C., Y. Hu, et al. (2012). "Heat shock factor Hsf1 cooperates with ErbB2 (Her2/Neu) protein to promote mammary tumorigenesis and metastasis." *J Biol Chem* **287**(42): 35646-35657.
106. Xiong, F., C. Wu, et al. (2011). "Genetic variation in an miRNA-1827 binding site in MYCL1 alters susceptibility to small-cell lung cancer." *Cancer Res* **71**(15): 5175-5181.
107. Yan, T. D., H. Wu, et al. (2010). "Oncogenic potential of retinoic acid receptor-gamma in hepatocellular carcinoma." *Cancer Res* **70**(6): 2285-2295.
108. Yang, E. S., Y. J. Huh, et al. (2013). "RNA interference targeting sensitive-to-apoptosis gene potentiates doxorubicin- and staurosporine-induced apoptosis of PC3 cells." *Anticancer Res* **33**(3): 847-855.
109. Yang, Y., V. MacLeod, et al. (2007). "The syndecan-1 heparan sulfate proteoglycan is a viable target for myeloma therapy." *Blood* **110**(6): 2041-2048.
110. Yin, Q., X. Wang, et al. (2010). "MicroRNA miR-155 inhibits bone morphogenetic protein (BMP) signaling and BMP-mediated Epstein-Barr virus reactivation." *J Virol* **84**(13): 6318-6327.
111. Yu, H. and R. Jove (2004). "The STATs of cancer--new molecular targets come of age." *Nature Reviews Cancer* **4**(2): 97-105.
112. Zhang, L., M. Yang, et al. (2012). "DLX4 upregulates TWIST and enhances tumor migration, invasion and metastasis." *Int J Biol Sci* **8**(8): 1178-1187.



113. Zhao, J., X. Y. Wu, et al. (2013). "Analysis of genetic aberrations on chromosomal region 8q21-24 identifies E2F5 as an oncogene with copy number gain in prostate cancer." Med Oncol **30**(1): 465.
114. Zhao, X., C. Graves, et al. (2009). "Mechanism of regulation and suppression of melanoma invasiveness by novel retinoic acid receptor-gamma target gene carbohydrate sulfotransferase 10." Cancer Res **69**(12): 5218-5225.
115. Zhou, J., Y. Zhu, et al. (2011). "A distinct role of RhoB in gastric cancer suppression." Int J Cancer **128**(5): 1057-1068.
116. Zhu, R., Y. Yang, et al. (2012). "Ascl2 knockdown results in tumor growth arrest by miRNA-302b-related inhibition of colon cancer progenitor cells." Plos One **7**(2): e32170.

### **3'LIFE/High-throughput Nucleofection and Dual Luciferase Protocols V1 Developed by Justin Wolter, Mangone Lab, 5-21-2013**

This portion of the protocol describes a method to transfect plasmid-DNA in 96-well format using the Lonza Nucleofector 96-well shuttle plates. This protocol is optimized for HEK293T cells. Each cell line will have optimal transfection efficiency/survival with individualized buffer conditions, pulse code, and number of cells. These conditions must be optimized for each cell line used.

#### **General Comments:**

- For consistent transfections, cells should be plated at a sufficient density that they are rapidly dividing, and not be more than 90% confluent at time of transfection. This is typically achieved by calculating the doubling time of the cell line, and seeding cells 24-48 hours prior to transfection at a density that will result in 70-90% confluency at the time of transfection. Cells should not be allowed to become 100% (and thus growth inhibited) at any time prior to transfection, as this will reduce transfection efficiency, growth rate, and thus expression of the miRNA and luciferase reporter.
- The Lonza Nucleofector and HEK293T cells are extremely sensitive to the buffer conditions used to transfect cells. Extreme accuracy when preparing buffers will ensure consistent performance of the equipment. Additionally, extra care must be taken when performing the assay to minimize evaporation of buffers. We have observed that this is the most significant source of errors when using the Nucleofector and in-house buffers. Specifically, special care must be taken to minimize evaporation following loading the buffer/DNA/cell mixture into the 96-well shuttle device. In our hands, loading the shuttle device immediately before transfection reduces errors in transfection.
- Owing to the sensitivity of the nucleofection buffer conditions, the total volume of transfected materials (including cells and plasmids) should not exceed 10% of the total liquid pipetted into each well of the 96-well shuttle device. To achieve this the pLIFE-miRNA plasmid should be at a concentration of least 500ng/uL.
- Transfection buffer is composed of PBS supplemented with 1.5% HEPES, pH to 7.00. This should typically be prepared fresh, although can be stored for up to 1 month at 4°.
- In formulating buffer and plasmid DNA volumes, we have found that assuming 120 reactions for each 96-well plate sufficiently accounts for errors in pipetting and volume lost using liquid reservoirs and multichannel pipettes.

The following protocol assumes transfecting 3 96-well plates in one experiment. Each plate will correspond to the same 96-well mini-prepped sample of pLIFE-3'UTR plasmids, and be treated with either pLIFE-miRNA-blank, pLIFE-miRNA-#1, pLIFE-miRNA-#2.

1. **(24-48 hrs prior to transfection):** Seed sufficient quantity of HEK293T cells based on the number of 96-well plates being transfected. Each well in a 96-well plate will require

75,000 cells, and each plate requires  $9 \times 10^6$  cells (equivalent of 120 wells to account for use of reservoir and multichannel pipette). In our lab, the doubling time of HEK293T cells is ~20 hrs, which can be used to calculate the seeding density based on the number of hours prior to transfection the seeding is occurring. We use 145mm circular culture plates, which, when grown to ~90% confluency, is sufficient for 3 96-well transfections, with ~10% of cells to spare to reseed a new plate.

## 2. Items to be prepared prior to transfection

- a. Transfection Buffer: 18 uL per well, 120 wells/96-well plate = 2.16 mL per plate. Set this aside into an epindorf tube and set aside (being careful not to leave buffer exposed to prevent evaporation).
- b. Plasmids:
  - i. pLIFE-3'UTR: In 96-well format, resuspended to ~100 ng/uL per well. We typically observe insufficient luciferase signal if plasmid concentration falls below 40 ng/uL. 4 wells must be reserved for the following controls: 1) no pLIFE-3'UTR (to measure background of luciferase assay), 2) pLIFE-SV40 3'UTR (negative target control), 3) positive control for miRNA #1, 4) positive control for miRNA #2. We typically reserve wells A1-A4 for these controls.
  - ii. pLIFE-miRNA: At a concentration of 500 ng/uL for each miRNA and Blank control plasmids.
- c. 96-well cell culture plates: Each well should possess 200 uL of DMEM supplemented with 10% FBS, 1% Pen/Strep, and placed in a 37° incubator for use following transfection.
- d. Warm media, trypsin (0.25%) to 37°.
- e. Turn on all Nucleofector hardware followed by Nucleofector Shuttle software. Pulse code used for HEK293T cells and PBS/HEPES buffer should be set to FF120.

## 3. Preparation of Plasmid DNA and cells:

- a. Prepare 3 stocks of pLIFE-miRNA + transfection buffer for each miRNA. This stock should account for 50% (10uL) of total volume of each well, multiplied by 120 wells. Thus, each stock should contain 1.08 mL buffer + 120 uL plasmid DNA (pLIFE-miRNA).
- b. Remove cells from plate by eluting media, washing *gently* with PBS, and treating with ~5mLs 0.25% trypsin for 5 minutes. Neutralize trypsin with an equal volume of media, and pellet cells at 300g for 5 minutes.
- c. Remove trypsin/media, and resuspend pellet in ~5-10 mLs media (depending on cell density).
- d. Count cells. Mangone lab uses the Countess from Invitrogen. Cells should be >95% viable and within accurate range of machine. Inaccurate count can result from having extremely high cell concentrations ( $>6.0 \times 10^6$ /mL). Transfecting too many cells can drastically reduce efficiency of miRNA targeting by reducing plasmid:cell ratio and/or decreasing transfection efficiency.
- e. Aliquot three tubes of cells, each containing  $9 \times 10^6$  cells, corresponding to the cells required for transfection of one 96-well plate. Spin cells at 300g for 3 minutes.

- f. Remove media. Be sure to remove as much as possible with minimal disturbance of the pellet. Excess media can impact transfection efficiency.
- g. Resuspend cells in 1.2 mLs buffer/plasmid mixture, and set aside.
- h. The following steps detail resuspension of pLIFE-3'UTR plasmid in transfection buffer. As this occurs in 96 well plates, care should be taken to avoid evaporation of buffer by covering plates at all times.
  - i. Using a multichannel pipette, move 32.4 uL transfection buffer into each well of a 96 well PCR plate (9 uL [per transfection] \* 3 [plates] \* 1.2 [to account for pipette error]).
  - ii. Add 3.6 uL of mini-prepped pLIFE-3'UTR plasmid.
  - iii. Mix thoroughly.
  - iv. Pipette 10 uL of this mixture into each well of the 96-well shuttle device. Cover 96-well shuttle device.

#### 4. Transfection:

- a. Move 1.2 mLs of first cell/buffer/pLIFE-miRNA plasmid mixture into reservoir. Mix well. Add 10 uL of this mixture into the first 96-well shuttle already containing 10 uL buffer/pLIFE-3'UTR. **Mix well by pipetting up and down several times.** Equal suspension of cells in the buffer will entail even and thorough passage of the electrical current through the cuvette and maximize transfection efficiency. Place 96-well shuttle on the Nucleofector device and initiate transfection.
- b. Once transfection is complete, add 100 uL of prewarmed media from 96-well culture plate to each well of the 96-well shuttle and mix well. Move 100 uL from each well into the 96-well culture plate. Mix well, with pipette positioned vertically, as cells will tend to move to the sides of the well unless mixed properly.
- c. Repeat 3a-3b for the remaining two plates.
- d. Culture cells for 48-72 hours at 37°, followed by the dual luciferase assay (see below).

- 5. Cleaning 96-well shuttle plates:** These plates can be reused following transfection and proper washing to ensure no carry over between nucleic acids between experiments. We perform two 70% EtOH washes using a spray bottle to completely fill each well, followed by wiping down excess EtOH on the electrode strips (bottom side) and allowing cuvettes to completely dry in the culture hood. We have tested for carry-over contamination by transfecting 12 wells with 2 ug pmaxGFP plasmid each into HEK293T cells, followed by a single wash with 70% EtOH, and a second transfection with no plasmid DNA. With this extremely high plasmid concentration, extremely bright reporter, and only one wash we observed no fluorescence in the second transfection for all 12 wells. We have reused each cuvette >30 times each with no detectable decrease in transfection efficiency.

**Buffer preparation for dual-luciferase assay:** The following buffer components can be prepared ahead of time and stored at room temperature (unless otherwise noted).

#### Firefly Luciferase Assay Buffer Components:

Stock solutions prepared separately and stored at 10x concentration:

| Reagent: | Final Concentration (1x) |
|----------|--------------------------|
|----------|--------------------------|

|                                         |       |
|-----------------------------------------|-------|
| Glycylglycine                           | 25mM  |
| K <sub>x</sub> PO <sub>4</sub> (pH 7.8) | 15 mM |
| MgSO <sub>4</sub>                       | 15 mM |
| DTT (store at 4°)                       | 1 mM  |
| EGTA                                    | 4 mM  |

Note: EGTA will not go into solution at neutral pH. Slowly add NaOH to EGTA until it dissolves completely.

Reagents added just before luciferase assay:

|                  |        |
|------------------|--------|
| ATP              | 2 mM   |
| Beetle luciferin | 200 uM |

**Renilla luciferase assay buffer:**

*Renilla* luciferase buffer can be prepared ahead of time to 1x concentration and stored at room temperature:

| Reagent:                        | Final Concentration (1x) |
|---------------------------------|--------------------------|
| NaCl                            | 1.1 M                    |
| Na <sub>2</sub> EDTA            | 2.2 mM                   |
| KH <sub>2</sub> PO <sub>4</sub> | .22 M                    |
| NaN <sub>3</sub>                | 1.3 mM                   |
| pH to 5.0                       |                          |

Reagents added just before luciferase assay:

|                |           |
|----------------|-----------|
| BSA            | .44 mg/mL |
| Coelenterazine | 2.5 uM    |

**Beetle Luciferin (firefly luciferase substrate) Reconstitution:**

- 50 mg luciferin in 7.134 mLs H<sub>2</sub>O (25 mM). Aliquot into 105 uL tubes.
- Store @ -80°. Per Promega technical support, this should be stable for >6 months, but may be light sensitive.

**Coelenterazine (*Renilla* luciferase substrate) Reconstitution:**

- Acidify methanol by adding HCl to final concentration of 5 mM (<3 pH).
- Reconstitute 250 ug coelenterazine with 2.36 mL acidified methanol (250 uM)
- Aliquot 100 uL into 1.5 mL tubes for use on 1 96-well plate.
- Store @ -80°C (stable for at least 6 months at -80°, but may be light sensitive).

**Protocol for buffer preparation and 96-well dual-luciferase assay using Promega Glomax 96-well dual injection luminometer**

1. **Lysis buffer:** 4 parts water, 1 part 5x passive lysis buffer (Promega) in a reservoir. You need 26 uL/well, so calculate accordingly with ~20 wells extra to account for loss in the reservoir. Buffer is stored at -20° and can be extremely viscous, thus prior to allowing the

5x buffer to approach room temperature will improve accuracy. Mix 1x lysis buffer well prior to use.

2. **Analyze each well for transfection efficiency using fluorescence microscopy.** Note any inconsistent wells that did not transfect efficiently, or are expressing low levels of RFP. These can cause inconsistencies in data and should be removed from the analysis.
3. **Completely remove the media from the cells**, being careful not to elute too quickly and lose cells. Remaining media will dilute the lysate and cause fluctuations in values across experiments. Add 26  $\mu$ L of lysis buffer to each well, and place on a plate shaker/rocker at low/moderate speed.
4. **Start the timer.** For consistency I allow 30 minutes from addition of lysis buffer to the start of measurement. This time is used to prepare buffers, wash and prime the luminometer(s), and transfer lysate to opaque measurement plates. Any of these steps can be completed beforehand (with the exception of the final steps of buffer preparation and lysate transfer) to ensure that you do not go exceed 30 minutes of lysis.

**Wrap tubes (typically Falcon 15/50mL tubes) containing of the firefly and *Renilla* buffers with tinfoil as substrates may be light sensitive.**

**The following instructions are for 1 96-well plate. If multiple plates are being measured simultaneously (with multiple luminometers) then multiply all volumes by then number of luminometers/plates. If multiple plates are being measured sequentially on one luminometer, create buffer master mixes with everything except ATP and substrates, and add these reagents followed by pHing immediately before the beginning of the luciferase assay. ATP and substrates may degrade over time; consistency in the amount of time these reagents are in the buffer will improve consistency across multiple plates.**

5. **Firefly luciferase buffer:** Have the five reagents for the firefly buffer prepared to 10x concentration. Prepare a master mix with the following:
  - For each 96-well plate, add 1mL of each reagent to 5mLs water, adding EGTA last.
  - Add .025 g ATP (powder) per plate just before you add the firefly substrate. Keep ATP on ice at all times. ATP will degrade over time, so if you are measuring more than one plate consecutively buffer must be made fresh beginning at this step for each additional plate.
  - Add 100  $\mu$ L beetle luciferin (substrate) (previously aliquoted and stored at 100x conc.) Buffer should change to yellowish color based on pH.
6. **To *Renilla* buffer:**
  - Per 96-well plate, aliquot 10 mLs of "*Renilla* buffer".
  - Add 100  $\mu$ L of BSA (44 mg/mL stock) per plate
  - If screening more than one plate, separate master mix into 10mL aliquots.
  - Add 100  $\mu$ L coelenterazine to buffer (previously aliquoted and stored at 100x conc.)
7. **pH Buffers:** pH the firefly to 8.0, followed by the *Renilla* to 5.0 using NaOH and HCl. The activity of each buffer, and the ability of the *Renilla* buffer to quench the Firefly luciferase activity is highly dependent on pH. For consistent results be extremely accurate in this step. Bring volume of each buffer (corresponding to 1 96-well plate) to 10.5 mLs to accommodate for luminometer priming.



- 8. Transfer lysate to opaque white plates:** At this point the cells should be close to done lysing (~20 min has passed?), and are ready to be transferred to white opaque plates. Take 25 uL from each well using a multichannel pipette, be sure to pipet up and down vigorously to break up the clumps of cells and homogenizing the lysate. Once transferred to white plates, lysate may appear pinkish. This may be due to poor removal of culture media, but is also commonly observed with high-quality transfections (RFP).
- 9. Setting up the luminometer:** Turn on the luminometer and select the program. The program is a promega protocol, is listed in the 'DLR' folder, and is called DLR with two injections, not column format. Select the wells you wish to test (all is the default), and make sure to extend the "Delay before measurement" setting to 5 seconds, with a 10 second measurement time (see Dyer, et al. 2000, *Analytical Biochem*, for explanation).
- 10. Capillary wash steps:** water 3x, EtOH 3x, water 3x, dry 3x. Prime buffers once into the waste, and then prime a second time back into the buffer tubes to ensure mixing. Firefly buffer is injected first and should be primed in the left capillary, followed by *Renilla* in the right capillary.
- 11. Luciferase assay:** Each plate takes ~48 minutes to read. After you are done save the file first, and then repeat the wash steps and shut off the luminometer.
- 12. Reading multiple plates:** Multiple plates can be read and data stored on the same excel file, however we have encountered issues with multiple plate reads where the luminometer program will crash. Be sure to save all data between measurements and take screenshots if program crashes before save is possible! Replace old buffers with new, being sure to prime at least twice with new buffers before starting the new plate
- 13. Considerations:** White opaque plates can be reused following a wash with DI water, 70% EtOH, DI water, and spun upside down in a centrifuge to remove any liquid before it can evaporate.
